# Reverse Genetics with a Full-length Infectious cDNA Clone of Bovine Torovirus

Ujike Makoto<sup>\*¶1,2</sup>, Etoh Yuka<sup>¶1</sup>, Urushiyama Naoya<sup>1</sup>, Taguchi Fumihiko<sup>1</sup>, Enjuanes Luis<sup>3</sup> and Kamitani Wataru<sup>4</sup>.

1. Laboratory of Veterinary Infectious Diseases, Faculty of Veterinary Medicine, Nippon Veterinary and Life Science University, 1-7-1 Kyonan-cho, Musashino, Tokyo 180-8602, Japan

2. Research Center for Animal Life Science, Nippon Veterinary and Life Science University, 1-7-1 Kyonan-cho, Musashino, Tokyo 180-8602, Japan

3. Department of Molecular and Cell Biology, National Center of Biotechnology (CNB-CSIC), Campus Universidad Autónoma de Madrid, Darwin 3, 28049 Madrid, Spain

4. Department of Infectious Diseases and Host Defense, Gunma University Graduate School of Medicine, Gunma, Japan.

>

¶ equally contribute to this work

\*Corresponding author:

Laboratory of Veterinary Infectious Diseases, Faculty of Veterinary Medicine, Nippon Veterinary and Life Science University, 1-7-1 Kyonan-cho, Musashino, Tokyo 180-8602, Japan

E-mail: [ujike@nvl.u.ac.jp](mailto:ujike@nvl.u.ac.jp) tel: 81-422-31-4151 Ext. 3530

## 22 Abstract

23 Torovirus (ToV) has recently been classified in the new family Tobaniviridae, although it belonged to the  
24 Coronavirus (CoV) family historically. Reverse genetics systems for many CoVs have been established, but  
25 none exist for ToVs. Here, we describe a reverse genetics system using a full-length infectious cDNA clone of  
26 bovine ToV (BToV) in a bacterial artificial chromosome (BAC). Recombinant BToV containing genetic markers  
27 had the same phenotype as wild-type (wt) BToV. To generate two types of recombinant virus, the  
28 Hemagglutinin-esterase (HE) gene was manipulated, since cell-adapted wtBToV generally loses the full-  
29 length HE (HEf), resulting in soluble HE (HEs). First, recombinant viruses with HEf and HA-tagged HEf or  
30 HEs genes were rescued; these showed no significant differences in cell growth, suggesting that HE is not  
31 essential for viral growth in cells. Then, recombinant virus in which HE was replaced by the Enhanced Green  
32 Fluorescent Protein (EGFP) gene expressed EGFP in infected cells, but showed significantly reduced viral  
33 growth compared to wtBToV. Moreover, the recombinant virus readily deleted the EGFP gene after one  
34 passage. Interestingly, one variant with mutations in non-structural proteins (NSPs) showed improved EGFP  
35 expression and viral growth during serial passages, although it eventually deleted the EGFP gene, suggesting  
36 that these mutations contributed to EGFP gene acceptance. These recombinant viruses provide new insights  
37 regarding BToV and its reverse genetics will help advance understanding of this neglected pathogen.

## 38 **Importance**

39 ToVs are diarrhea-causing pathogens that have been detected in many species, including humans. BToV has  
40 spread worldwide, leading to economic losses. We developed the first reverse genetics system for  
41 Tobaniviridae using a BAC-based BToV. Using this system, we showed that recombinant BToVs with HEf  
42 and HEs showed no significant differences in cell growth. In contrast, clinical BToVs generally lose the HE  
43 gene after a few passages but some recombinant viruses retained the HE gene for up to 20 passages,  
44 suggesting some benefits of HE retention. The EGFP gene of the recombinant viruses was unstable and was  
45 rapidly deleted, likely via negative selection. Interestingly, one virus variant with mutations in NSPs was  
46 more stable, resulting in improved EGFP-expression and viral growth, suggesting that the mutations  
47 contributed to some acceptance of the exogenous EGFP gene without clear positive selection. The  
48 recombinant BToVs and reverse genetics developed here are powerful tools for understanding fundamental  
49 viral processes and their pathogenesis and for developing BToV vaccines.

## 50 Introduction

51 Torovirus (ToV) belongs to order *Nidovirales*, family *Tobaniviridae*, subfamily *Torovirinae* and genus  
52 *Torovirus* (1). ToVs are a causative agent of diarrheic and respiratory diseases, and are detected in many  
53 species including bovine, equine, swine, goat, and human species (2–7). Although ToV infections are generally  
54 asymptomatic or do not have severe symptoms, the bovine torovirus (BToV) (8–16) and porcine ToV (PToV)  
55 (17–22) are distributed globally, causing economic loss. At present, there are no drugs and vaccines available  
56 for treatment and prevention of this disease.

57 ToVs are enveloped, positive-sense single-stranded RNA viruses with a genome 25–30kb in length, comprising  
58 the conserved six open reading frames. The first two-thirds of the genome contains ORF1a and ORF1b, with  
59 an overlap by a frameshift, encoding the replicase/transcriptase proteins (22–25). The remaining one-third  
60 of the genome encodes four structural proteins: spike (S), membrane (M), hemagglutinin-esterase (HE), and  
61 nucleocapsid (N) (26–30). ToV genome seemed to have occasionally undergone inter-genotype recombination  
62 events (31–33).

63 ToVs were difficult to propagate in cultured cells, with the exception of equine ToV (6); however, in the last  
64 13 years, a new cell line, human rectal tumor-18 (HRT18) cells, has been shown to be susceptible to BToV,  
65 and several BToVs in Japan were successfully isolated and propagated using HRT18 cells (33–37). BToV with  
66 the full length HE gene was initially isolated from diarrheal feces, whereas cell-adapted BToV, after several  
67 passages in HRT18 cells, generally lost a full-length HE protein as a result of HE gene mutation (34, 35).  
68 This finding suggests that the HE protein is not essential for replication in cell culture and may instead  
69 suppress it.

70 ToVs historically belonged to the family *Coronaviridae*, which was divided into the subfamilies coronavirus  
71 (CoV) and ToVs, since both viruses are structurally and morphologically similar despite having some  
72 differences (24, 38–40). CoVs are mainly associated with respiratory and enteric diseases and are regarded  
73 as important pathogens in humans and animals. In human CoVs, in addition to four human CoVs causing  
74 mild upper respiratory disease (41), three novel life-threatening CoVs that cause acute lung injury have  
75 emerged in the 21st century, namely, severe acute respiratory syndrome coronavirus (SARS-CoV) in 2002–  
76 2003 (42, 43), Middle East respiratory syndrome coronavirus (MERS-CoV) in 2012 (44), and SARS-CoV-2 in  
77 2019 (45, 46). In animals, some CoVs cause severe or lethal diseases in swine (porcine epidemic diarrhea  
78 virus [PEDV] and transmissible gastroenteritis virus [TGEV]), bovine (bovine CoV), avian (infectious

79 bronchitis virus [IBV]), mouse (mouse hepatitis virus [MHV]), and feline (Feline infectious peritonitis virus  
80 [FIPV]) animals. As such, numerous studies have been conducted on CoVs. Notably, reverse genetics systems  
81 for many human and animal CoVs, including the recently emerged SARS-CoV-2, have been established to  
82 study these fundamental viral processes and pathogenesis or to aid in vaccine development (47–68). Full-  
83 length cDNA-based reverse genetics systems of CoVs have been made, although there were obstacles such as  
84 large genome sizes, thereby complicating genome engineering, and the instability of some CoV replicase  
85 genes in bacteria. Currently, four systems are available: bacterial artificial chromosome (BAC) (48), in vitro  
86 ligation of cDNA fragments (47), vaccinia vector with full-length CoV cDNA (59), and the recently developed  
87 yeast artificial chromosome systems (60). Thanks to these systems, a greater understanding of CoVs has been  
88 gained.

89 In contrast to CoVs, only few studies of ToVs have been conducted, and no reverse genetics systems have  
90 been established since many ToVs are difficult to propagate in cells, and because less attention has been paid  
91 to ToVs as ToV infections are generally asymptomatic or not severe. In this study, we describe a reverse  
92 genetic system for BToV (Aichi strain) based on the cloning of a full-length genomic cDNA into BAC. Using  
93 this system, recombinant viruses with HA-tagged HE gene, untagged full-length HE gene, or with EGFP  
94 gene, were successfully rescued by manipulating the HE gene; these viruses were then characterized.

95

96

## 97 **Results**

### 98 **Full-length genome sequence of wild-type (wt) BToV.**

99 To determine the parent BToV (Aichi strain) for reverse genetics, the full-length genomic sequences of three  
100 plaque-purified BToVs were analyzed. We tried to determine the 5' terminal end of these viruses using the 5'  
101 RACE method, but several different sequences were observed in the terminal three bases: 5'-TGACGT-3', 5'-  
102 GTACGT-3', 5'-GGACGT-3', 5'-GACGT-3', 5'-ACGT-3', 5'-(-)CGT-3'. The sequence at the 5' terminal end of  
103 three published BToVs (25, 33) and two published PToVs (Accession # JQ860350 and KM403390) all shared  
104 the 5'-TGACGT-3' sequence, whereas equine ToV showed 5'-ACGT-3' (74). Whether the differences observed  
105 in the BToVs were due to the intrinsic features of BToV or due to suboptimal experimental condition of the  
106 5' RACE method remained unclear. However, 5'-TGACGT-3, previously reported in published BToVs and  
107 PToVs, was found in only one out of seven in our analysis, whereas 5'-ACGT-3' reported in equine BToV is a  
108 consensus sequence. Thus, in this study, the sequence at 5' terminal end of BToV was set as 5'-ACGT-3'. Two  
109 BToV clones showed the same sequence; from these, one was selected as the parent virus (wtBToV).

### 111 **Construction of a full-length BToV genome in BAC.**

112 Full-length BToV (Aichi strain) genome cDNA was assembled into the pBeloBAC11 plasmid carrying  
113 cytomegalovirus (CMV) immediate-early promoter, hepatitis delta virus ribozyme (Rz), and bovine growth  
114 hormone (BGH) termination, and the cDNA was inserted downstream off the CMV promoter and flanked by  
115 a 25-poly(A) sequence. The BToV genome cDNA was amplified into eight PCR fragments (BToV-A to H)  
116 carrying homology arms (hms) at both terminals, and these were sequentially assembled (Fig. 1A) using the  
117 Red/ET recombination method described in the Materials and Methods (Fig. 1B). After assembly of the eight  
118 fragments, the BAC carrying the full-length BToV genome cDNA (pBAC-BToV<sup>mut1</sup>) contained two single  
119 mutations at nucleotide (nt) G3399T and at nt T8469G, and the 1,350 bp *E. coli* chromosomal derived  
120 sequence was inserted at nt 10,136, likely to counter the toxic regions in bacteria observed in some CoVs (47,  
121 62, 63) (Fig. 2A). These two single mutations and *E. coli* sequence were reverted as described in the Materials  
122 and Methods (Fig. 2A).

### 124 **Rescue of recombinant BToV**

125 To distinguish between the parent wtBToV and recombinant wtBToV (rBToV) generated from the BAC

126 plasmid, two gene makers were inserted into the HE gene at nt T26530C and T26554A (both silent) (pBAC-  
127 BToV) (Fig. 2B). pBAC-BToV was first transfected into nonpermissive 293T, COS7, BHK, Vero, and Huh7  
128 cells because of the very low transfection efficiency of permissive HRT18 cells. Of these cells, 293T showed  
129 the best virus production with no clear cytopathic effect (CPE), and the viral titer of the supernatant 3 days  
130 post-transfection (dpt) averaged  $1.0 \times 10^{4.1}$  TCID<sub>50</sub>/ ml (N=3), suggesting that the host range specificity of  
131 BToV, which was difficult to propagate in cultured cells, was primarily determined by the entry step, which  
132 was also observed in CoVs (47, 59, 63). The supernatant from transfected 293T was inoculated into permissive  
133 HRT18 cells, after which the virus was plaque-purified three times, and then the purified virus was used to  
134 characterize phenotypic properties. CPE and plaque morphology induced or formed by rBToV were identical  
135 to parental wtBToV (Fig. 3B and 4A). Comparison of the full-length genome sequence between rBToV and  
136 wtBToV showed complete sequence identities except for two gene markers (Fig. 3C). To compare growth  
137 kinetics between rBToV and wtBToV, HRT18 cells were infected with a multiplicity of infection (MOI) of 0.001,  
138 and supernatants were harvested at the indicated times. rBToV and wtBToV had indistinguishable growth  
139 properties in HRT18 cells and had peaked titers of  $>1.0 \times 10^{6.4}$  TCID<sub>50</sub>/ml at 48 h post infection (pi) (Fig. 4D).  
140 Thus, a full-length infectious cDNA clone of BToV in the BAC system was successfully constructed, and  
141 features of the rescued rBToV and parental wtBToV had the same phenotypic properties in HRT18 cells.

#### 142 143 **Characterization of recombinant BToV with full-length HE or HA-tagged HE gene**

144 Although BToV initially isolated from clinical samples had full-length HE (HE<sub>f</sub>) genes, cell adapted BToV  
145 usually lost HE<sub>f</sub> due to a stop codon somewhere in HE gene. Cell-adapted wtBToV in our laboratory also has  
146 a stop codon at nt 481 (the base number of HE gene), CAG (Q)→TAG (stop), resulting in soluble HE 160 aa  
147 in length (HEs) (Fig. 3A). This suggested that HE protein is dispensable for virus replication in cells and may  
148 have a negative effect on it (34–37). However, the precise functions of BToV HE protein in cellular viral  
149 growth still remains elusive. To investigate HE gene stability and the effect of HE protein on viral growth in  
150 HRT18 cells, recombinant BToVs with HE<sub>f</sub>, or with HA-tagged HE<sub>f</sub> and HEs genes to facilitate their detection  
151 were generated (designated as rHE<sub>f</sub>, rHE<sub>f</sub>/HA, rHEs/HA, and rBToV was written as rHEs together here,  
152 respectively) (Fig. 3A). All these recombinant BToVs were successfully rescued using the same method  
153 described in rBToV. They displayed no significant differences in plaque morphology and CPEs (data not  
154 shown) in HRT18 cells compared to parental wtBToV and rBToV (rHEs) (Fig. 4A). To detect HE<sub>f</sub> or HA-tagged

155 HEf and HEs proteins, HRT18 cells infected with recombinant BToVs were fixed at 24 hpi. The cells were  
156 then subjected to an  $\alpha$ -NA esterase assay or to indirect immunofluorescence (IF) using mouse anti-M and  
157 anti-HE antiserum or using rabbit anti-HA and mouse anti-HA 12CA5 antibodies. Stained cells were  
158 observed under confocal laser scanning microscopy (Fig. 4B). M proteins were detected similarly in all  
159 cells infected with the recombinant BToVs, and HE proteins and  $\alpha$ -NA esterase activity were observed  
160 only in cells infected with rHEf and rHEf/HA. On the other hand, HEs/HA proteins were well stained  
161 by both anti-HA antibodies (only rabbit anti-HA antibody was shown), whereas HEf/HA protein was  
162 barely stained despite being well detected by mouse anti-HE antiserum (Fig. 4B). We next tried to detect  
163 HEf/HA by immunoblotting. Infected cells were lysed, and detection was performed using rabbit anti-N  
164 antiserum and two anti-HA antibodies. With similar detection of N proteins in all infected cells, HEs/HA  
165 could be detected in both anti-HA antibodies similar to IF results, whereas HEf/HA could not be detected by  
166 rabbit anti-HA but could only be detected by the mouse anti-HA 12CA5 antibody (Fig. 4C). To investigate  
167 whether the different reactivity of the C-terminal HA-tag was due to the modification of the HA-tag in the  
168 cytoplasm by either an infected cell metabolic change or viral proteins, HA-tagged proteins in COS7 cells  
169 transiently expressing HEf/HA and HEs/HA were attempted to be detected in the same way. Both HA-tagged  
170 proteins could be stained in IF (data not shown), but reactivity did not change in immunoblotting (Fig. 4C).  
171 Although we could not rule out the possibility that differences were due to the modification or due to the  
172 expression level of HA-tag of HEf/HA in infected cells from IF results, immunoblotting results at least  
173 suggested that the C-terminal HA-tag of HEf/HA had the specific structure that affects reactivity of the anti-  
174 HA antibodies. Finally, to compare growth kinetics, HRT18 cells were infected with these recombinant BToVs  
175 with a MOI of 0.001. All these recombinant BToVs, wtBToV, and rBToV (rHEs) had no significant differences  
176 in growth properties (Fig. 4D). These results indicated that recombinant BToVs could express full-length HE  
177 and HA-tagged proteins in infected cells with growth ability comparable to those of the parental wtBToV and  
178 to rBToV (rHEs)

179

#### 180 **Full-length HE gene stability of rHEf and rHEf/HA**

181 To assess stability of the full-length HE gene of rHEf and rHEf/HA, HRT18 cells were infected with two  
182 clones (No.1 and No.2) derived from different plaques of each virus, and viruses were serially passaged until  
183 twenty passages (P20). Cells were infected with the viruses harvested at the indicated passage history and



184 were fixed or lysed at 24 hpi, and then subjected to either  $\alpha$ -NA esterase assay or N protein-detection by  
185 immunoblotting (Fig. 5A and 5B). N proteins were detected in all infected cells (Fig. 5B). On the other hand,  
186 cells infected with rHEf No.2 and two rHEf/HA retained  $\alpha$ -NA esterase activity until P19, whereas cells  
187 infected with rHEf No.1 gradually decreased in activity during passages and completely lost activity at P19  
188 (Fig. 5A). RT-PCR of the supernatants from infected cells (resulting in +1 passage history) using primers  
189 flanking the HE gene showed that during serial passages, band sizes of rHEf No.1 without esterase activity  
190 and rHEf No.2 with esterase activity were not different (Fig. 5C). On the other hand, although both rHEf/HA  
191 exhibited esterase activity, a smaller band was observed in rHEf/HA No.2 from P10. To further study their  
192 HE genes, all these viruses at P19 were plaque-purified once, and the HE gene of viruses from six well-  
193 isolated plaques were sequenced. As summarized in Fig. 5D, all six rHEf No.1 sequences had one base  
194 deletion at nt T19 in the HE gene, causing 17 aa short peptide with a stop codon by -1 frame shifting, and  
195 three out of six had an additional deletion between nt 1,216 to nt 1,241. In contrast, all six rHEf No.2 retained  
196 the full-length HE gene, and one out of six had an amino acid substitution at T321I in the HE protein. Out  
197 of the six, five rHEf/HA No.1 retained the HA-tagged full-length HE gene, but one had an aa mutation within  
198 the HA-tag (YPYDYPDYA $\rightarrow$ YLYDYPDYA), whereas three rHEf/HA No.2 retained the HA-tagged full-length  
199 HE gene with a D247E substitution in the HE protein in one virus but the other three had a deletion between  
200 nt 278 to nt 878, causing a short soluble HE protein 99 aa in length. These data partly supported the idea  
201 that HE proteins are not essential or could have a negative effect on virus growth in HRT18 cells. However,  
202 it is notable that each one clone could retain the full-length HE gene up to at least twenty passages. Thus,  
203 cell adapted BToV may be able to retain full-length HE gene more stably in cells under certain conditions.

### 204 **Characterization of recombinant BToV carrying EGFP gene**

205 Since recombinant viruses carrying the reporter gene are helpful in understanding fundamental viral  
206 processes and for screening therapeutic compounds, we attempted to generate recombinant BToV by  
207 replacing the HE gene with the EGFP gene (rEGFP). Rescued rEGFP were plaque-purified three times and  
208 expanded (clone No.1 and No.2) or expanded without plaque purification (No.3 to No.6) because of the  
209 instability of the EGFP gene described below. rEGFP formed smaller and more heterogeneous plaques  
210 compared to the parent wtBToV (Fig. 6A). To detect EGFP in infected cells, infected cells at 36 hpi were  
211 observed under fluorescence microscope, or fixed, permeabilized, stained with mouse anti-M antiserum, and  
212

213 observed under confocal laser scanning microscopy (Fig. 6B). EGFP-expressions were observed only in cells  
214 infected with rEGFP but not with wtBToV and rBToV, and cells expressing EGFP always also expressed M  
215 protein (Fig. 6B). These infected cells were next subjected to N protein and EGFP detection by  
216 immunoblotting. Although the amount of N protein in the rEGFP-infected cells was significantly less than  
217 that of cells infected with wtBToV and rBToV, EGFP was only detected in rEGFP-infected cells (Fig. 6C).  
218 Comparison of growth kinetics among rEGFP, wtBToV, and rBToV showed that rEGFP significantly  
219 decreased growth ability. In four independent experiments, no virus could be detected at 24 hpi, and peak  
220 titer  $1.0 \times 10^{3.8-4.6}$  TCID<sub>50</sub>/ml was observed at 48 to 72 hpi in three experiments, which decreased by >2 log  
221 compared to parent viruses (Fig. 6D). In one experiment, peak titer reached  $1.0 \times 10^{6.6}$  TCID<sub>50</sub>/ml at 72 hpi,  
222 but the virus no longer expressed EGFP (Fig. 6D). These data indicated that rEGFP could express EGFP in  
223 infected cells but significantly decreased its growth properties. Moreover, rEGFP seemed to readily lose  
224 EGFP-expression during virus growth.

225 To study EGFP gene stability, HRT18 cells were infected with rEGFP, and viruses were serially passaged  
226 until five passages (P5). Cells were infected with rEGFP harvested at the indicated passage history and were  
227 observed under a fluorescence microscope (Fig. 7A). As a result, EGFP was not observed in most of the cells  
228 infected with rEGFP (No.1 to No.4) after one passage. RT-PCR of P0 and P1 viruses using primers flanking  
229 EGFP gene found that the all P0 rEGFP predominantly had the full-length EGFP gene, but smaller bands  
230 were observed in all P1 rEGFP (No.1 to No.4) (Fig. 7B). Of these, the major bands of P1 rEGFP (No.2 to No.4)  
231 were analyzed, and it was found that a large part of the EGFP gene was deleted (Fig. 7D), suggesting that  
232 rEGFP readily lost EGFP-expression due to deletion of EGFP gene after one passage.

233

### 234 **Improvement of EGFP-expression and growth properties in rEGFP variant**

235 Interestingly, rEGFP No.5 and No.6 maintained the EGFP gene after one passage. No.6 gradually decreased  
236 EGFP-expression until P5, while No.5 appeared to gradually increase (Fig. 7A). Thus, serial passages of  
237 rEGFP No.5 was continued until P15, and the viruses were then harvested. Cells were infected with rEGFP  
238 No.5 harvested at the indicated passage history and their supernatants (+1 passage history) were collected  
239 and subjected to RT-PCR targeting EGFP gene (Fig. 7B), or the infected cells were lysed at 36 hpi and  
240 subjected to N protein and EGFP detection by immunoblotting (Fig.7C). Although smaller bands were  
241 observed, rEGFP No.5 retained full-length EGFP gene at least until P6 and mainly lost it by P9 (Fig. 7B),

242 but EGFP-expression was still observed in infected cells even at P9 to an extent (data not shown). The major  
243 bands of P15 rEGFP No.5 (and P6 No.6: data not shown) were analyzed by sequencing, and a part of the  
244 EGFP gene was deleted (Fig. 7D). Similar to RT-PCR results, immunoblotting of N protein and EGFP of  
245 rEGFP showed that EGFP-expression level of No.5 was maximized at P5, and this gradually decreased until  
246 P11 (Fig. 7C). It should be noted that the EGFP-expression level or growth property seemed to dramatically  
247 increase compared to that of P0 rEGFP No.5.

248 To further investigate P5 rEGFP No.5, this was plaque-purified three times and three clones were expanded  
249 (designated rEGFP c1-c3). These variants formed similar plaque morphologies to wtBToV and rBToV (Fig.  
250 8A). Comparing growth kinetics among rEGFP c1-c3, wtBToV, and rBToV showed that their peak titer  
251 reached  $1.0 \times 10^{6.5-7.2}$  TCID<sub>50</sub>/ ml at 72 hpi, which is comparable to that of the parental viruses, although the  
252 peak was reached one day slower (Fig. 8B). Cells infected with rEGFP c1-c3 were lysed at 24 hpi, and these  
253 lysates were then subjected to N protein and EGFP detection. The result indicated that EGFP-expression  
254 levels in these rEGFP c1-c3 were dramatically improved compared to P0 original virus (Fig.8C). Analysis of  
255 the full-length genome sequence of rEGFP c1 revealed five aa substitutions at G1001S, C1442F, T2129I in  
256 NSP1, I3562T in NSP4, and I5327V in NSP10 (Helicase), respectively, strongly suggesting that these  
257 accumulated mutations in NSPs were involved in this phenotype (Fig.8D). Finally, EGFP gene stability in  
258 rEGFP c1-c3 were investigated. As shown in Fig. 8E, these variants tend to stably express EGFP until P4,  
259 but smaller bands due to the deletion of the full-length HE gene were mainly observed, with EGFP-expression  
260 decreasing until P6 (data not shown in rEGFP c3). Sequencing the major band of P7 rEGFP c1-c3 showed  
261 deletion of the EGFP gene, similar to those observed in other rEGFP (Fig.7D). These data indicated that any  
262 or all of the five mutations in NSPs would contribute to some acceptance of exogenous gene such as EGFP  
263 gene, resulting in improved EGFP-expression and viral growth in cells, although the EGFP gene was  
264 eventually lost

265

266 **Discussion**

267 In this study, we successfully constructed a full-length infectious BToV cDNA clone in a bacterial artificial  
268 chromosome. To our knowledge, this is the first reverse genetics system for the new family *Tobnaviridae*.

269

270 **BAC construction**

271 Red/ET recombination method used to assemble eight BToV cDNA fragments into the BAC has been recently  
272 utilized for full-length cDNA assembly of some CoVs, PEDV, and FIPV (58, 75) and for introducing mutations  
273 (76–78). This method is more rapid and produces mutated clones more efficiently than traditional methods  
274 (78); however, despite several tries, the unintentional insertion of an *E. coli*-derived sequence which may  
275 counter toxic regions could not be removed. Red/ET seemed not to function in restoring the toxic region to  
276 the host. Thus, a type IIS restriction enzyme, SapI, was inserted into both ends of the *E. coli*-derived sequence,  
277 and this was removed by in vitro self-ligation. The resulting plasmid could be successfully propagated in *E.*  
278 *coli* without pRed/ET enzyme. Similar observations were not seen in the full-length genome assembly of  
279 PEDV and FIPV into low copy BAC plasmid (58, 75), but were seen in the subcloning of the TGEV cDNA  
280 fragment into high copy plasmids (47). The position wherein the *E. coli* sequence is inserted is similar in both  
281 (BToV at nt 10,136 and TGEV at nt 9,973), suggesting that these regions (BToV is in 3C-like protease) were  
282 particularly toxic in bacteria in ToVs and CoVs. Though it remains unclear whether very small amounts of  
283 3C-like protease in *E. coli* or, functional viral proteins cleaved by this protease causes toxicity, the *E. coli*-  
284 derived sequence was inserted not when the BToV-C fragment containing the 3C-like protease gene was  
285 assembled but when the full-length 1ab gene (BToV-F fragment) was assembled. For BToV, since insertion of  
286 the *E. coli*-derived sequence was observed even in low copy BAC plasmid, this region may be more toxic than  
287 that of CoV or Red/ET recombination method may be prone to this. Thus, to establish other BAC-based ToV  
288 reverse genetics using this method, it may be better to counter the toxic region (3-C like protease gene)  
289 beforehand with an *E. coli*-derived sequence flanked by type IIS restriction enzymes for subsequent in vitro  
290 ligation.

291

## 292 **Characterization of recombinant BToV with manipulating HE gene.**

293 Since cell-adapted BToV generally lost the full-length HE gene, HE protein is not essential for viral growth  
294 in cells or could suppress growth (34–37, 69). To study this, we generated rHEf with full-length HE gene and  
295 rHEf/HA, rHEs/HA with HA-tagged HEf, or HEs gene. Comparing their growth kinetics to wtBToV and  
296 rBToV (rHEs) showed no significant differences; however, during serial passaging of two clones from each  
297 rHEf and rHEf/HA, each clone lost the full-length HE gene, supporting the above idea. In contrast, each the  
298 other clone could retain the full-length-HE gene at least until twenty passages. This was unexpected because  
299 another BToV (Niigata strain) isolated from a clinical sample in our laboratory easily lost the full-length HE  
300 gene somewhere due to a stop codon insertion until eight passages during cell-adaptation (Islam and Taguchi,  
301 unpublished data). Thus, the negative effect on HE protein in the cells of cell-adapted Aichi-BToV may be  
302 lower than that of non-cell-adapted Niigata-BToV. Furthermore, HE proteins of cell-adapted Aichi-BToV may  
303 have some advantage in terms of viral growth in the cells.

304 HE proteins are retained not only in ToV, but also in some of the beta CoVs (79). HE is a type I glycoprotein  
305 on the viral envelope with two reversible functional domains: one binds O-acetylated sialic acids (O-Ac-Sia)  
306 and the other destroys this binding. Both viruses also contain another type I glycoprotein S protein  
307 responsible for receptor-binding and fusion activity. Among some beta CoVs, the species *Betacoronavirus-1*,  
308 including human coronavirus OC43 (HCoV-OC43), bovine coronavirus, and porcine hemagglutinating  
309 encephalomyelitis virus, use O-Ac-Sia as the receptor via the S protein (80, 81). Thus, these viruses bind to  
310 O-Ac-Sia via both the S and HE proteins, while HE acts as a receptor-destroying enzyme that promotes  
311 release of progeny viruses from infected cells and helps avoid attachment to non-permissive cells or to  
312 receptor-like decoy. The importance of HE in these viruses has been reported, and HE of HCoV-OC43 plays  
313 an essential role in the efficient release of progeny viruses from infected cells (82) and balancing receptor-  
314 binding and receptor-destroying of HE contributes to host adaptation (83). In contrast, the species *Murine*  
315 *coronavirus*, a mouse hepatitis virus (MHV) in which the S protein uses CAECAM1a as receptor (84) and in  
316 which HE binds to O-Ac-Sia exclusively (85) does not require HE proteins for viral growth. In fact, many cell-  
317 adapted laboratory strains of MHV fail to produce HE (86), with MHV rapidly losing it during serial passages  
318 (87, 88), which is similar to BToV. On the other hand, experiments using recombinant MHV carrying the full-  
319 length HE gene showed about half of the HE deficiencies until six passages (88), while our experiment showed

320 that some recombinant BToVs could retain HE at least until twenty passages. This may be explained by the  
321 hemagglutination activity of the S protein of cell-adapted Aichi-BToV (37). It is not known whether the  
322 hemagglutination activity is mediated via O-Ac-Sia binding, but, if so, HE protein may contribute to the  
323 regulation of S protein-mediated cell surface attachment to facilitate release of progeny viruses. Alternatively,  
324 in twenty passages, accumulation of mutations in other regions may contribute to HE protein acceptance, as  
325 observed in rEGFP. Although the precise function of BToV HE remains to be elucidated, further studies using  
326 these recombinant BToVs will bring better understanding.

### 327 328 **Characterization of recombinant BToV with EGFP gene.**

329 Since recombinant viruses expressing reporter proteins such as GFP, Red Fluorescent Protein and luciferase  
330 are useful for understanding fundamental viral processes and for high-throughput testing of therapeutic  
331 compounds, some recombinant CoVs carrying these reporters were generated (50, 54, 55, 57, 58). These  
332 recombinant CoVs have their ORF3, ORF4 or ORF5 accessory genes replaced with reporter genes, and these  
333 could all stably express reporter proteins, with their growth abilities comparable to or slightly reduced  
334 compared to the parent virus. In contrast, rFGFP in which the HE gene, which is also an accessory gene, was  
335 substituted with EGFP gene, could express a fluorescent protein, but it showed significantly reduced growth  
336 compared to parental wtBToV, as well as less EGFP-expression. Furthermore, rEGFP easily lost EGFP-  
337 expression ability after only one passage due to the deletion of HE genes. Since EGFP itself is a neutral  
338 protein, which probably does not give any advantage or disadvantage to viral growth in cells, whereas rEGFP  
339 with deleted EGFP gene increased in terms of growth properties (Fig.6D), EGFP gene itself rather than  
340 EGFP would lead to a significant decrease in viral growth. It is interesting to note that, despite eight  
341 independent experiments, starting points of HE deletion in the five were concentrated at around specific  
342 positions, namely nt 24, 27, 28, and 30, and likewise the end points of the four were concentrated at around  
343 nt 668, 671, 673, and 690 (Fig.7D), suggesting that “specific negative positions” of the EGFP gene are easily  
344 recognized and deleted. Deletion patterns of the EGFP gene showed that in many cases, a large part of or the  
345 entire EGFP, even including a part of the transcription regulating sequence of EGFP (HE) and, the  
346 untranslated region between EGFP (HE) and the N genes, were deleted, whereas a relatively short deletion  
347 leading to retention of more than 80% of the EGFP gene was also observed (Fig. 7D). All rEGFP with deleted

348 genes rapidly replaced intact rEGFP, likely under negative selection of EGFP genetic structure. These  
349 suggested that either the entirety or a part of the EGFP gene structure may suppress viral genome replication  
350 or transcription, resulting in decreased viral growth.

351 On the other hand, rEGFP variant obtained during serial passages showed remarkably improved EGFP-  
352 expression and growth ability in the cells. This is noteworthy considering EGFP gene has a negative effect  
353 on viral growth whereas a neutral EGFP protein exists without clear positive selection. rEGFP variant  
354 contained accumulated five mutations in NSPs: three in NSP1, and one each in NSP4 and NSP10 (helicase),  
355 respectively. Though functions of NSP1 and NSP4 of ToVs remain unknown, the primary function of helicase,  
356 which is highly conserved among nidoviruses including ToVs and CoVs, is to unwind DNA or RNA duplexes  
357 (89). The crystal structure of MERS-CoV helicase (corresponding to NSP13) showed that it comprises  
358 multiple domains, an N-terminal Cys/His rich domain (CH) binding to three zinc atoms, a beta-barrel domain,  
359 and a C-terminal helicase core with two Rec-A like domains (90). Protein sequence alignment between MERS  
360 and BToV helicase by MEGA6 software (91) revealed that the mutation at I5327V (I68V in helicase) was  
361 located next to Cys69 (corresponding to Cys72 of MERS-CoV helicase) in the CH, one of the cysteine residues  
362 that coordinated with the third zinc atom. It was reported that alanine substitutions in highly conserved  
363 Cys/His in CH of HCoV-229E and other nidovirus equine viral arteritis have big effects on helicase activity  
364 (92, 93). Thus, one possibility is that mutation in the CH of rEGFP helicase may facilitate to unwind “specific  
365 negative positions” of the EGFP gene, resulting in increased growth. However, even this variant showed  
366 similar EGFP gene deletion patterns to other intact rEGFP until five passages. This finding that the virus  
367 tolerates unfavorable foreign gene to some degree without clear positive selection may contribute in  
368 understanding the mechanism by which the virus evolves by accepting other genes.

369  
370 In this article, we describe a reverse genetics platform for BAC-based BToV, which is a useful tool for  
371 understanding fundamental viral processes and pathogenesis and for BToV vaccine development. Moreover,  
372 since the rEGFP variant carrying the middle stable EGFP gene can be plaque-purified and expanded for  
373 practical use, this recombinant virus can be used for high-throughput testing of therapeutic compounds and  
374 entry assays. Recently, in addition to a unique combination of discontinuous and continuous ToV RNA  
375 synthesis(94) , differences between CoVs and ToVs such as “hidden” proteins (U1 and U2) of unknown

376 function suspected to be translated from non-AUG initiation codons (CUG-initiation) (95) and N protein  
377 localization, have been highlighted. This reverse genetics system can provide future understanding of ToV  
378 proteins and unique RNA synthesis mechanisms.

379



## 380 **Materials and Methods**

### 381 **Cells and Viruses**

382 Human rectal adenocarcinoma subcell line (HRT18-Aichi) (34, 36, 69), 293T, and COS7 cells were maintained  
383 at 37°C and 5% CO<sub>2</sub> in Dulbecco's Modified Minimum Eagle Medium (DMEM) (Sigma-Aldrich, MO, USA)  
384 supplemented with 10% fetal bovine serum (FBS) [DMEM(+)] and penicillin (50 units/mL)-streptomycin (50  
385 µg/mL) (PS) (Sigma-Aldrich). Cell-adapted BToV (Aichi strain) was propagated in HRT18 cells in DMEM  
386 without FBS [DMEM(-)], as FBS inhibits BToV infection.

387

### 388 **Antibodies**

389 Anti-HE, anti-M polyclonal mouse (mouse anti-HE and anti-M) antiserum, and anti-N polyclonal rabbit  
390 (rabbit anti-N) antiserum were obtained by in vivo electroporation of mice with pCAGGS-BToV-HEf according  
391 to the method previously described (70), by immunizing mice with the M protein synthetic peptide (2-  
392 FETNYWPFDPQAPN-15), and by immunizing rabbit with the N protein synthetic peptide (141-  
393 EVSSGDQETPHKIA-154). Anti-HA-tag mouse monoclonal antibody (Clone: 12CA5) (mouse anti-HA 12CA5)  
394 was obtained from supernatants of the hybridoma cells. Anti-HA-tag polyclonal rabbit IgG (rabbit anti-HA)  
395 antibody (MBL Nagoya, Japan) and anti-GFP mouse monoclonal antibody (mF<sub>x</sub>75) (mouse anti-GFP)  
396 (Fujifilm Wako, Osaka, Japan) were purchased. Secondary antibodies, horseradish peroxidase (HRP)-  
397 conjugated goat anti-rabbit IgG (Thermo Fisher Scientific, MA, USA), HRP-conjugated goat anti-mouse IgG  
398 (Rockland Immunochemicals, PA, USA), Alexa Fluor™ 594-conjugated goat anti-mouse IgM and IgG  
399 (Thermo Fisher Scientific), FITC-conjugated goat anti-rabbit IgG (MP Biomedicals, CA, USA), and FITC-  
400 conjugated goat anti-mouse IgG+IgM+IgA (Rockland Immunochemicals) and IgG+IgM (Jackson Immuno  
401 Research, PA, USA) were purchased. Two Alexa Fluor™ 594-conjugated goat anti-mouse and two FITC-  
402 conjugated goat anti-mouse antibodies were mixed 1:1, respectively, and were used.

403

### 404 **Plaque assay**

405 HRT18 cells were seeded onto 6-well plates with  $1.0 \times 10^6$  cells/well. The next day, the cells were inoculated  
406 with 400 µL of diluted virus in order to form 10–20 plaques per well and incubated at 37°C for 1.5 h.  
407 Unabsorbed virus were removed and cells were overlaid with MEM (Sigma-Aldrich) containing 0.65%

408 agarose (Nacalai tesque, Kyoto, Japan), 2nM L-glutamine (Sanko Junyaku Co., Tokyo, Japan), 10mM HEPES  
409 (Dojindo, Kumamoto, Japan) and PS, and these were incubated at 37°C until the appropriate sized plaque  
410 were observed (approx. three days). Cells were fixed with 10% formaldehyde (Fujifilm Wako) and stained  
411 with crystal violet. For plaque purification of virus, without cell fixation, a well-isolated plaque was picked  
412 and resuspended in 100 µL DMEM(-) and stored at -70°C. Then, a 50 µL aliquot from the 100 µL plaque  
413 solution was expanded in HRT18 cells with DMEM(-) in a 10 cm dish, and then these viruses were harvested  
414 after the appropriate CPE was observed and was stored at -70°C as a master stock. 200 µL of master virus  
415 was expanded in the cells in an 18 cm dish and was used as a working wtBToV.

### 416 417 **RNA extraction, RT-PCR and sequencing**

418 Viral RNA was extracted from 100–250 µL of the supernatant using TRIzol® LS Reagent (Thermo Fisher  
419 Scientific) according to the manufacturer's instructions. Complementary DNA was synthesized using a  
420 SuperScript III® first-strand synthesis system (Thermo Fisher Scientific) and Oligo dT<sub>15</sub> primer (TaKaRa,  
421 Shiga, Japan) or Oligo dT-3 sites Adaptor Primer for 3' RACE (Takara). To analyze the complete BToV genome,  
422 seven fragments of about 3500–4500 base pair (bp) overlapping 170–360 bp (which correspond to BToV-  
423 derived sequence of fragments BToV-A to -G described below) and one fragment of about 320 bp of the 3'-  
424 terminal region by 3' RACE were amplified using Phusion High-Fidelity PCR Kit (New England Biolabs, MA,  
425 USA) under the following conditions [98°C, 50 s; 35 cycles of (98°C, 10 s; 60–65°C, 30 s; 72°C, 1 min/kb); 72°C  
426 10 min], and these PCR fragments were purified with AMPure XP (Beckman Coulter, CA, USA). 5' ends of  
427 the viral genome were analyzed by 5'-Full RACE Core Set (TaKaRa) and the PCR products of 5' RACE were  
428 cloned using pGEM®-T Easy Vector Systems (Promega, WI, USA). Purified PCR fragments and pGEM  
429 cloning 5'-terminal sequence of BToV were sequenced using primers designed for every ~300 bp of the BToV  
430 genome. Sequences were assembled by MEGA6 (71) or Sequencher software (Hitachi High-Tech, Tokyo,  
431 Japan). Even without 5' RACE, almost the entire full-length sequencing was achieved, except for 21 bp at the  
432 5' terminal end derived from the primer, which was applied to the full-length sequencing of rBToV and rEGFP  
433 c1.

### 434 435 **BAC construction of wtBToV**

436 pBeloBAC11 containing CMV immediate-early promoter, Rz, and BGH termination (48) was used. Full-  
437 length cDNA of the BToV genome was assembled under the control of the CMV promoter and was flanked at  
438 the 3'-terminal end by a poly(A) tail (Fig. 1A), using a Red/ET recombination system counterselection BAC  
439 modification kit (Gene Bridges Heidelberg, Germany) according to the manufacturer's instructions (Fig. 1B).  
440 Briefly, *E. coli* strain NEB10 $\beta$  (Bio-Rad) carrying the BAC was electroporated with the pRed/ET expression  
441 plasmid using an Eppendorf Eporator<sup>®</sup> (Eppendorf, Hamburg, Germany). The Red/ET recombinant enzyme  
442 was induced by L-arabinose (Sigma-Aldrich) and a temperature shift from 30°C to 37°C, and then linear  
443 rpsL/Neo counter-selection/selection cassette (prepared by PCR) flanked by hms was electroporated so that  
444 the Red/ET recombination inserts the rpsL/Neo cassette into the target position through hms. Only *E. coli*  
445 carrying the BAC with the rpsL/Neo cassette could be selected by kanamycin at 30°C. The Red/ET enzyme  
446 was induced in the same way in *E. coli* carrying modified BAC and was electroporated with the linear cDNA  
447 fragment of BToV flanked by hms. Red/ET recombination could replace the rpsL/Neo cassette with the cDNA  
448 fragment of BToV. Only *E. coli* carrying the BAC with the target BToV cDNA fragment could be selected by  
449 streptomycin at 37°C at which the pRed/ET plasmid was removed (Fig. 1B). To use this system, the full-  
450 length genomic sequence of BToV was divided into eight fragments flanked by the hms and was assembled  
451 into the BAC plasmid in a sequential order (Fig. 1A). To distinguish the base numbers between BToV and  
452 BAC, BToV genome is 28,313 nt (without poly-A and was written as the normal number) while that of BAC  
453 is 8,219 bp, written as the number in parentheses starting from the CMV promoter. The BToV-derived  
454 sequences of each fragment correspond to nt 1 to 4,497 (BToV-A), nt 4,139 to 8,512 (BToV-B), nt 8,301 to  
455 12,748 (BToV-C), nt 12,413 to 16,612 (BToV-D), nt 16,444 to 20,731 (BToV-E), nt 20,512 to 24,877 (BToV-F), nt  
456 24,675 to 28,196 (BToV-G), and nt 27,987 to 28,313 (BToV-H), respectively. The 5' terminal hm of the BToV-A  
457 fragment and the other fragments were regions of a partial CMV promoter, (205) to (605), and regions  
458 overlapping between the fragments, respectively. The 3' terminal hm of all fragments is the region including  
459 Rz and BGH, which is (606) to (1,001) (Fig. 1A). Fragments BToV-A to -G were prepared using standard PCR  
460 protocols with the overlap extension technique (72). Fragment BToV-H was prepared through PCR using a  
461 plasmid template containing a chemically synthesized BToV sequence between nt 27,987 to 28,313, 25 nt of  
462 adenine (pA), and the hm of the 3' terminal sequence described above (Eurofins, Luxembourg, Luxembourg).  
463 All fragments were amplified using KOD Plus Neo (TOYOBO, Osaka, Japan) and purified with gel-extraction

464 and phenol-chloroform extraction before electroporation. After assembly of the eight fragments, BAC  
465 carrying the cDNA clone of the full-length BToV (pBAC-BToV<sup>mut1</sup>) contained three mutations, namely, two  
466 single mutations at nt G3399T (E871D in NSP1 protein) and at nt T8469G (silent), and the *E. coli*  
467 chromosomal derived sequence of 1,350 bp was inserted at nt 10,136 (Fig. 2A). pRed/ET recombination  
468 method could revert two substitutions but failed to delete the *E. coli* chromosomal derived sequence. To delete  
469 this sequence in vitro, type IIS restriction enzyme SapI (New England Biolabs), which recognizes asymmetric  
470 DNA sequences and cleave outside their 5'-GCTCTTCN ↓ NNN -3' recognition site, was used. First, two SapI  
471 sites at nt (4,526) and (5,736) near or in the SopA gene of BAC plasmid were removed by introducing single  
472 mutations, 5'-(4,526) GCTCTTC → CCTCTTC and 5'-(5,736) GCTCTTC → GGTCTTC respectively, using  
473 NEBuilder HiFi DNA Assembly Master Mix (New England Biolabs) and two NgoMVI restriction sites located  
474 outside the two SapI sites at nt (3,633) and (7,549). Next, SapI recognition sites were inserted on both sides  
475 (one in the reverse direction) of the *E. coli* chromosomal derived sequence by pRed/ET recombination. Finally,  
476 the resulting BAC plasmid (pBAC-BToV<sup>mut2</sup>) was treated with SapI and was subjected to in vitro self-ligation  
477 (pBAC-BToV<sup>pre</sup>). pBAC-BToV<sup>pre</sup> was electroporated into NEB10β and was successfully propagated.

### 479 BAC construction of mutant BToVs

480 To introduce mutations into the HE gene of pBAC-BToV<sup>pre</sup>, the rpsL/Neo cassette was inserted through the  
481 5' terminal hm including a partial M gene, nt 26,037 to 26,249 and the 3' terminal hm including 3'-UTR,  
482 poly(A), Rz, and BGH, 28,150 to (1,001), using pRed/ET recombination (Fig. 2B). The resulting BAC with the  
483 rpsL/Neo cassette (pBAC-BToV<sup>HE/N-rpsL/Neo</sup>) allows manipulation of not only the HE gene but also the N gene.  
484 The rpsL/Neo cassette was replaced with the mutated HE gene or with the Enhanced Green Fluorescent  
485 Protein (EGFP) gene (Fig. 2B).

486 Cell-adapted wtBToV in our laboratory lost full-length HE (HEf) due to a stop codon at nt 481 (the base  
487 number of HE gene), CAG (Q) → TAG (stop), resulting in the soluble form HE 160 aa in length (HEs) (36, 37)  
488 (Fig. 3A). Using pBAC-BToV<sup>HE/N-rpsL/Neo</sup>, four pBAC plasmids were created; pBAC-BToV with two genetic  
489 markers at nt T207C (T26530C) and nt T228A (T26554A), pBAC-BToV-HEf with the replacement of a stop  
490 codon (TAG) to CAG to express full-length HE, pBAC-BToV-HEs/HA and pBAC-BToV-HEf/HA with the  
491 addition of HA-tag at the C-terminal end of HEs and HEf proteins, respectively. pBAC-BToV-HEf/HA had the

492 HE gene mutation at nt 1,029, GAATTC→GAACTC (silent) to remove the EcoRI site. In addition, pBAC-  
493 BToV-EGFP in which the HE gene was completely replaced with EGFP was created. All BAC plasmids were  
494 purified with NucleoBond Xtra Maxi (Macherey-Nagel, Dueren, Germany) from 1,000mL cultured *E. coli*  
495 cells.

496

#### 497 **Rescue of recombinant BToVs**

498 293T and HRT18 cells were seeded into 24-well plates at  $1.5 \times 10^5$  and  $2.0 \times 10^5$  cells/well, respectively, on  
499 the day before the experiment. 293T cells were transfected with 2.0  $\mu$ g pBAC-BToV or -HE mutant and -  
500 EGFP with 1.5  $\mu$ L Lipofectamine 3000 and 1.0  $\mu$ L P3000 Regent (Thermo Fisher Scientific) and incubated at  
501 37°C. The next day, DMEM(+) was replaced with 500  $\mu$ L DMEM(-) to remove FBS. After 3 dpt, supernatants  
502 were harvested. The 50  $\mu$ L supernatant was inoculated to susceptible HRT18 cells which had been washed  
503 with phosphate buffered saline (PBS) twice after which 450  $\mu$ L DMEM (-) was added. After 2 dpi,  
504 supernatants were harvested and viruses were plaque-purified three times. A 20  $\mu$ L aliquot from the 100  $\mu$ L  
505 plaque suspension was added to HRT18 cells with 480  $\mu$ L DMEM(-) in 24-well plates, and the supernatant  
506 was harvested after 2 dpi. This was stored at -70°C as a master virus. Next, 100  $\mu$ L of the master viruses  
507 were expanded on HRT18 cells with 10 mL DMEM(-) in a 10 cm dish, and these viruses were harvested after  
508 the appropriate CPE was observed. These were stored as passage 0 (P0) viruses, which were used for  
509 subsequent experiments. In the case of rEGFP, plaque purification of some recombinant viruses (No.3 to  
510 No.6) were omitted because of EGFP gene instability. 293T cells prepared on a 3 cm dish were transfected  
511 with 5 times reagent volumes and pBAC-BToV-EGFP. The 2.5 mL supernatants of transfected HRT18 cells  
512 were inoculated into the cells in a 10 cm dish to expand the viruses, and these viruses were then harvested.  
513 In this case, these were used as passage 0 (P0) viruses. The nomenclature of recombinant BToV rescued from  
514 these BAC plasmids was rBToV(rHEs), rHEf, rHEs/HA, rHEf/HA and rEGFP, respectively (Fig. 3A).

515

#### 516 **Immunofluorescence staining**

517 A 35 mm glass base dish (12 mm glass area) (Iwaki, Shizuoka, Japan) was seeded with  $1.0 \times 10^5$  HRT18 cells,  
518 the day before the experiment. Cells were washed twice with PBS and infected with 300  $\mu$ L recombinant  
519 BToV in DMEM(-) with a MOI of 0.05. After 24 hpi (and 36 hpi only for the rEGFP), infected cells were  
520 washed with PBS, fixed with 4% paraformaldehyde for 20 min at room temperature (rt), and were

521 permeabilized with 0.2% Triton X-100 for 20 min at RT. Cells were incubated with mouse anti-HE, anti-M  
522 antiserum, or rabbit and mouse anti-HA antibodies at 4°C overnight, and were then incubated with a mixed  
523 FITC-conjugated goat anti-mouse or mixed AlexaFluor™ 594-conjugated goat anti-mouse for mouse  
524 antiserum and FITC-conjugated goat anti-rabbit antibodies for rabbit antibody, for 2 h at rt. Cell nuclei were  
525 stained with Hoechst 33258 solution (Dojindo) for 20 min at rt. PBS washing was done twice between each  
526 step. Stained cells were observed under confocal laser scanning microscopy using an LSM 710 laser scanning  
527 microscope (Carl Zeiss, Oberkochen, Germany).

### 529 **α-naphthyl acetate esterase activity**

530 HRT18 cells grown in 24-well plates were infected with recombinant BToVs with a MOI of 0.05. At 24 hpi,  
531 cells were fixed with fixative solution, stained for a α-naphthyl acetate esterase with a α-NA esterase staining  
532 kit (Muto Pure Chemicals, Tokyo, Japan) according to the manufacturer's instructions, and observed under  
533 phase-contrast microscopy.

### 535 **Immunoblotting**

536 HRT18 cells grown in 24-well plates were infected with the recombinant BToVs with a MOI of 0.05. COS7  
537 cells were transfected with 1.0 µg pCAGGS-HEf or pCAGGS-HEs with 1.5 µL Lipofectamine 3000 and 2.0 µl  
538 P3000 Regent. At 24 hpi (and 36 hpi only for rEGFP), infected HRT18 cells and 40 hpt transfected COS7 cells  
539 were lysed with 100 µL sample buffer (50 mM Tris, 2% SDS, 0.1% bromophenol blue, 10% glycerol, and 1%  
540 2-mercaptoethanol) and were boiled for 5 min. N protein, EGFP, and HA-tagged proteins of samples were  
541 analyzed by sodium dodecyl sulfate-polyacrylamide gel electrophoresis (SDS-PAGE) and were transferred to  
542 a PVDF membrane (Merck Millipore, Tokyo, Japan). The membrane was incubated with rabbit anti-N  
543 antiserum or mouse anti-GFP antibody, and then with HRP-conjugated anti-rabbit and anti-mouse  
544 antibodies, respectively. To detect HA-tagged proteins, mouse-anti-HA 12CA5 antibody for HA-tagged HEf  
545 and rabbit anti-HA antibody for HA-tagged HEs were used because of differences in their reactivity. Protein  
546 bands were visualized with ECL Prime Western Blotting Detection Reagent (GE Healthcare, IL, USA) on a  
547 Light Capture II instrument (ATTO, Tokyo, Japan).

549 **Growth kinetics of recombinant BToVs**

550 HRT18 cells in 24-well plates were washed twice with PBS and were infected with recombinant BToVs with  
551 a MOI of 0.001. After 1.5 h adsorption at 37°C, unadsorbed viruses were removed and cells were washed  
552 twice with PBS, and 0.5 mL DMEM(-) was added. Viruses in the supernatant were collected at 2, 24, 48, and  
553 72 hpi and the supernatant was clarified by centrifugation at 12,000 rpm for 5 min at 4°C. Virus titers in the  
554 culture media were determined in a 96-well plate by TCID<sub>50</sub>, as previously described (73).

556 **Measurement of the stability of HE and EGFP gene**

557 HRT18 cells in a 24-well plate were washed twice with PBS after which 0.5 mL DMEM(-) was added; these  
558 were then infected with recombinant BToVs with a MOI of 0.001. After the appropriate CPE was observed (2  
559 to 3 dpi), the supernatant was harvested and 0.5 uL was inoculated to the fresh cells, resulting in a serial  
560 passages by 1,000-fold diluted virus. To estimate stability of the HEf and EGFP genes during serial passages,  
561 HRT18 cells in a 24-well plate were infected with rHEf and rHEf/HA harvested at the indicated passage  
562 history with a MOI of 0.05, and cells at 24 hpi were subjected to an  $\alpha$ -NA esterase assay or to immunoblotting  
563 of N proteins. EGFP-expression of the infected cells with rEGFP were monitored during serial passages under  
564 a fluorescence microscope (Olympus CKX41 U-RFLT50; Olympus, Tokyo, Japan). Later, images of cells  
565 infected with rEGFP harvested at the indicated passage history at the same conditions were taken, and  
566 EGFP and N proteins were detected by immunoblotting. Supernatants of the infected cells (resulting in +1  
567 passage history) were subjected to RNA extraction, RT-PCR, and sequencing described above. PCR fragments  
568 of 1130 and 1630 bp containing HE and EGFP genes, respectively, were amplified using Takara ExTaq  
569 (Takara) under the following conditions [94°C, 5min; 30 cycles of (94°C, 30 s; 50°C, 30 s; 72°C, 1 min/kb);  
570 72°C 10min]. DNase treatment was also performed before RNA extraction to digest BAC plasmid from  
571 transfection, depending on passage history.

572

573 **Figure legends**

574 **Fig. 1.** Assembly of a BToV full-length cDNA into a BAC and flowchart of Red/ET recombination. (A) The  
575 genome sequence of BToV is divided into eight fragments (BToV-A to H), and each fragment contained  
576 homology arms (hm) overlapping each fragment at the 3' and 5' terminal ends (vertical dashed line). To  
577 distinguish the base number between BToV genome and BAC, the BToV genome of 28,313 nt without poly(A)  
578 (25 nt) was written as the normal number, while BAC of 8,219 bp was written as the number in parentheses  
579 starting with the CMV promoter. (B) (i) *E. coli* carrying the BAC was electroporated with the pRed/ET  
580 plasmid, and the Red/ET recombinant enzyme was induced by L-arabinose. (ii) The linear *rpsL*/Neo counter-  
581 selection/selection cassette flanked by hms was electroporated, and the Red/ET enzyme inserted the *rpsL*/Neo  
582 cassette into the target position via hms. After selecting appropriate antibodies, (iii) the Red/ET enzyme in  
583 *E. coli* carrying the modified BAC could replace the *rpsL*/Neo cassette with the cDNA fragment of BToV in  
584 the same way. Only *E. coli* carrying BAC with the target cDNA fragment could be selected by antibodies and  
585 37°C at which the pRed/ET plasmid was removed.

586

587 **Fig. 2.** Schematic diagram of pBAC-BToV construction strategy. (A) (i) BAC-BToV<sup>mut1</sup> contained two  
588 mutations at nt 3,399 (E→D) and 8,469 (silent), *E. coli* chromosomal insertion at 10,136 and two SapI sites  
589 at nt (4,526) and (5,736) on BAC. Two mutations were reverted by the pRed/ET recombination method. To  
590 remove the *E. coli*-derived sequence, two SapI sites on BAC were removed by single nt substitution of the  
591 recognition site (which is shown below) using in vitro recombination, and (ii) the SapI recognition sites (one  
592 is in reverse direction) were inserted on both sides of the *E. coli* derived sequence by pRed/ET recombination.  
593 (iii) Finally, the resulting BAC plasmid (pBAC-BToV<sup>mut2</sup>) was treated with SapI and subjected to in vitro self-  
594 ligation (pBAC-BToV<sup>pre</sup>). (B) To introduce genetic makers of pBAC-BToV<sup>pre</sup>, *rpsL*/Neo cassette was inserted  
595 between nt 26,249 and 28,150 containing partial M, HE, and N genes via hms (pBAC-BToV<sup>HE/N-rpsL/Neo</sup>). The  
596 *rpsL*/Neo cassette was replaced with HE carrying the genetic makers at nt 26,530 and 26,554, with the  
597 surrounding sequence via the hms (pBAC-BToV).

598

599 **Fig. 3.** Schematic diagram and generation of recombinant BToVs (A) Cell-adapted wtBToV lost full-length  
600 HE (HEf, 419aa) due to a stop codon at nt 481 (the base number of HE gene), resulting in the soluble form



601 HE (HEs, 160aa). rHEf/HA and rHEs/HA were added to the HA-tag at the C-terminal end of HEs and HEf  
602 proteins, respectively. rEGFP carries a reporter EGFP gene in which HE gene was completely replaced. nt:  
603 nucleotide, aa: amino acid. (B) CPE of HRT18 cells infected with wtBToV and rBToV. HRT18 cells infected  
604 with a MOI of 0.05 were observed at 24 hpi under phase-contrast microscopy. (C) Sequence analysis of  
605 wtBToV and rBToV at genetic marker sites (underlined) in HE gene.

606

607 **Fig.4.** Growth and characteristics of recombinant HE mutant BToVs. (A) Representative of plaque  
608 morphology in the 6-well plate of recombinant BToVs at 3 dpi. (B) (Upper) Detection of the membrane (M),  
609 HE, and HA-tagged proteins of recombinant BToVs by indirect immunofluorescence. HRT-18 cells were  
610 infected with these viruses with a MOI of 0.05 and infected cells were fixed, permeabilized at 24 hpi, and  
611 then stained with mouse anti-M and anti-HE antiserum or rabbit anti-HA antibodies and FITC-conjugated  
612 secondary antibodies (green). The nuclei were stained with Hoechst (blue). Staining cells were observed  
613 under confocal laser scanning microscopy. (Lower)  $\alpha$ -NA esterase activity of the cells infected with  
614 recombinant BToVs. Fixed infected cells described above were tested for  $\alpha$ -NA esterase activity. (C)  
615 Immunoblotting of HA-tagged and N proteins in HRT18 cells infected with recombinant BToVs and COS7  
616 cells transfected with plasmid encoding HEs/HA and HEf/HA. Infected HRT18 cells at a MOI of 0.05 at 24  
617 hpi and transfected COS7 cells at 40 hpt were lysed, and the lysates were subjected to immunoblotting.  
618 Proteins were detected with rabbit anti-N antiserum and mouse-anti-HA 12CA5 antibody for HEf/HA and  
619 rabbit anti-HA antibody for HEs/HA. (D) Growth kinetics of recombinant BToVs. HRT-18 cells were infected  
620 with a MOI of 0.001. At the indicated time, supernatants of infected cells were harvested, and virus titers  
621 were determined by TCID<sub>50</sub>. The mean and standard deviation of three independent experiments are shown  
622 (N = 3). Dashed line shows detection limit. N.D.: not detected.

623

624 **Fig.5.** Full-length HE gene stability of recombinant HE mutant BToVs. (A)  $\alpha$ -NA esterase activity of infected  
625 cells with recombinant BToVs carrying full-length HE gene during serial passages. HRT-18 cells in 24-well  
626 plate infected with a MOI of 0.05 were fixed at 24 hpi, and then tested for  $\alpha$ -NA esterase activity. Two clones  
627 (No.1 and No.2) derived from different plaques of each virus were used. (B) Immunoblotting of N proteins in  
628 HRT18 cells infected with recombinant BToVs described above at the indicated passage history. (C) RT-PCR

629 of the HE gene of recombinant BToVs. The supernatant from infected cells (resulting in +1 passage history)  
630 were amplified by RT-PCR using primers flanking the HE gene (shown in figure D, 1670 bp). Amplicons were  
631 analyzed by agarose gel electrophoresis. (D) Sequencing analysis results summary of recombinant BToVs HE  
632 genes. Viruses at P19 were plaque-purified once and six well-isolated plaques were picked, and then these  
633 viruses were inoculated into fresh HRT18 cells. The HE gene of each supernatant was amplified and  
634 sequenced. 5/6 means that 5 out of 6 plaques have the HE proteins described in figure.

635  
636 **Fig.6.** Growth and characteristics of recombinant BToV carrying EGFP gene. (A) Representative of plaque  
637 morphology of rEGFP at 3 dpi. In these rEGFP, 293T cells in 3 cm dish were transfected with BAC-BToV-  
638 EGFP, and the supernatants harvested after 2 dpt were inoculated into fresh HRT18 cells in a 10 cm dish  
639 without plaque purification. This was stored as passage 0 (P0) virus, and the viruses obtained from each  
640 independent experiment were numbered (No.3 to No.6) (B) Detection of EGFP-expression (green) in infected  
641 cells with rEGFP under a fluorescence microscope. HRT18 cells were infected with rEGFP No.3 with a MOI  
642 of 0.05, and infected cells were stained with Hoechst (Blue) at 36 hpi. Living infected cells were observed  
643 under a fluorescence microscope (left). Infected cells were fixed at 36 hpi, permeabilized, stained with mouse  
644 anti-M antiserum and AlexaFluor™ 594-conjugated secondary antibody (red), and observed by confocal laser  
645 scanning microscopy (right). Cells infected with rBToV, wtBToV were observed or fixed at 24 hpi. (C)  
646 Immunoblotting of EGFP and N proteins in infected cells with rEGFP. Infected cells described above were  
647 lysed at 36 hpi. Cells infected with rBToV and wtBToV were lysed at 24 hpi. Proteins in the lysates were  
648 detected with rabbit anti-N antiserum and mouse anti-GFP antibody. (D) Growth kinetics of rEGFP No.3.  
649 Virus titers were determined as described in Fig. 4. Each result of four independent experiments of rEGFP  
650 No.3 is shown. Dashed line shows detection limit. N.D.: not detected.

651  
652 **Fig.7.** EGFP gene stability of rEGFP. (A) EGFP-expression of rEGFP during serial passages. HRT-18 cells  
653 were infected with a MOI of 0.001, and then 1,000-fold diluted virus was inoculated into fresh cells. Viruses  
654 were then harvested after 3 dpi. Two rEGFP (No.1 and No.2) were plaque-purified and cloned, while four  
655 rEGFP (No.3 to No.6) described in Fig. 6 were not. Cells were infected with 1,000-fold diluted rEGFP  
656 harvested at the indicated passage history and observed at 36 hpi under a fluorescence microscope. In P0

657 viruses, infected cells with a MOI of 0.05 (actual experiment was 0.001) are shown to easily observe EGFP-  
658 expression. (B) RT-PCR of the EGFP gene of rEGFP. The supernatant viruses from infected cells (+1 passage  
659 history) were amplified by RT-PCR using primers flanking the EGFP gene (Figure D, 1130bp). Amplicons  
660 were analyzed by agarose gel electrophoresis. (C) Immunoblotting of EGFP and N proteins in cells infected  
661 with rEGFP No.5 at indicated passage history. Cells were infected with 1,000-fold diluted rEGFP No.5 from  
662 P1 and infected with P0 viruses (rEGFP No5, rBToV, wtBToV) at a MOI of 0.05. Infected cells with rBToV  
663 and wtBToV and with rEGFP No.5 were lysed at 24 hpi and at 36 hpi, respectively. (D) Summary of EGFP  
664 gene sequencing analysis of rEGFP. Major bands of EGFP gene of each supernatant were purified and  
665 sequenced.

666

667 **Fig.8.** Improvement of the growth kinetics and EGFP-expression of rEGFP. (A) Representative of plaque  
668 morphology of variant rEGFP. The P5 rEGFP No.5 was plaque-purified three times, and three clones were  
669 expanded (designated c1 to c3). (B, C) Growth kinetics and immunoblotting of rEGFP (c1 to c3). Virus titers  
670 (N=4) were determined and immunoblotting was performed as described in Fig. 6. Dash line shows detection  
671 limit. N.D.: not detected. The cells were infected with a MOI of 0.05, and lysed at 24 hpi for variant rEGFP  
672 rBToV, wtBToV and at 36 hpi for P0 rEGFP No.5. (D) Full-length genome sequence of rEGFP c1. Mutations  
673 different from the pBAC-BToV-EGFP are shown. (E) Genetic stability of EGFP gene of rEGFP c1 and c2.  
674 Analysis of EGFP-expression and EGFP gene of these viruses during serial passages are described in Fig.7

675

676

677 **Acknowledgments**

678 We thank Dr. Tsunemitsu Hiroshi (Nishimikawa Livestock Hygiene Service Center, Japan) for providing cell-  
679 adapted BToV (Aichi strain) and Drs. Asanuma Hideki (National Institute of Infectious Diseases, Japan) and  
680 Yuasa Noriyuki (Tokyo chemical industry co. Ltd., Japan) for providing mouse anti-HE and anti-M antiserum,  
681 respectively. This work was supported by a Grant-in-Aid for Scientific Research (C; No.19K06393) from  
682 the Ministry of Education, Culture, Sports, Science and Technology in Japan, and by the Grant for Joint  
683 Research Project of the Research Institute for Microbial Diseases, Osaka University.

684

685 **References**

- 686 1. ICTV (International Committee on Taxonomy of Virus). 2019. Virus Taxonomy: 2019 Release.
- 687 2. Vanopdenbosch E, Wellemans G, Petroff K. 1991. Breda virus associated with respiratory disease in  
688 calves. *Vet Rec* 129:203.
- 689 3. Duckmanton L, Luan B, Devenish J, Tellier R, Petric M. 1997. Characterization of torovirus from human  
690 fecal specimens. *Virology* 239:158–68.
- 691 4. Kroneman A, Cornelissen LA, Horzinek MC, de Groot RJ, Egberink HF. 1998. Identification and  
692 characterization of a porcine torovirus. *J Virol* 72:3507–11.
- 693 5. Woode GN, Reed DE, Runnels PL, Herrig MA, Hill HT. 1982. Studies with an unclassified virus isolated  
694 from diarrheic calves. *Vet Microbiol* 7:221–40.
- 695 6. Weiss M, Steck F, Horzinek MC. 1983. Purification and Partial Characterization of a New Enveloped  
696 RNA Virus (Berne Virus). *J Gen Virol* 64:1849–1858.
- 697 7. Ito T, Okada N, Okawa M, Fukuyama S, Shimizu M. 2009. Detection and characterization of bovine  
698 torovirus from the respiratory tract in Japanese cattle. *Vet Microbiol* 136:366–371.
- 699 8. SH L, HY K, EW C, D K. 2019. Causative Agents and Epidemiology of Diarrhea in Korean Native Calves.  
700 *J Vet Sci* 20.
- 701 9. Nogueira JS, Asano KM, de Souza SP, Brandão PE, Richtzenhain LJ. 2013. First detection and molecular  
702 diversity of Brazilian bovine torovirus (BToV) strains from young and adult cattle. *Res Vet Sci* 95:799–  
703 801.
- 704 10. Lojkić I, Krešić N, Šimić I, Bedeković T. 2015. Detection and molecular characterisation of bovine corona  
705 and toroviruses from Croatian cattle. *BMC Vet Res* 11:202.
- 706 11. Koopmans M, van Wuijckhuise-Sjouke L, Schukken YH, Cremers H, Horzinek MC. 1991. Association of  
707 diarrhea in cattle with torovirus infections on farms. *Am J Vet Res* 52:1769–73.
- 708 12. Hoet AE, Saif LJ. 2004. Bovine torovirus (Breda virus) revisited. *Anim Heal Res Rev* 5:157–71.
- 709 13. Hoet AE, Nielsen PR, Hasoksuz M, Thomas C, Wittum TE, Saif LJ. 2003. Detection of Bovine Torovirus  
710 and other Enteric Pathogens in Feces from Diarrhea Cases in Cattle. *J Vet Diagnostic Investig* 15:205–  
711 212.
- 712 14. Gülaçtı İ, Işdan H, Sözdutmaz İ. 2014. Detection of bovine torovirus in fecal specimens from calves with

- 713 diarrhea in Turkey. *Arch Virol* 159:1623–1627.
- 714 15. Duckmanton L, Carman S, Nagy E, Petric M. 1998. Detection of bovine torovirus in fecal specimens of  
715 calves with diarrhea from Ontario farms. *J Clin Microbiol* 36:1266–70.
- 716 16. H L, B Z, H Y, C T. 2020. First Detection and Genomic Characteristics of Bovine Torovirus in Dairy  
717 Calves in China. *Arch Virol* 165.
- 718 17. Zhou L, Wei H, Zhou Y, Xu Z, Zhu L, Horne J. 2014. Molecular epidemiology of Porcine torovirus (PToV)  
719 in Sichuan Province, China: 2011–2013. *Virology* 11:106.
- 720 18. Y F, Y K, F S, H A, R I, K S, Y K, T O, M O, T F, S T, Y O, J S, T M, T O, M N. 2020. Complete Genome  
721 Sequencing and Genetic Analysis of a Japanese Porcine Torovirus Strain Detected in Swine Feces. *Arch*  
722 *Virol* 165.
- 723 19. Shin D-J, Park S-I, Jeong Y-J, Hosmillo M, Kim H-H, Kim H-J, Kwon H-J, Kang M-I, Park S-J, Cho K-O.  
724 2010. Detection and molecular characterization of porcine toroviruses in Korea. *Arch Virol* 155:417–422.
- 725 20. Pignatelli J, Grau-Roma L, Jiménez M, Segalés J, Rodríguez D. 2010. Longitudinal serological and  
726 virological study on porcine torovirus (PToV) in piglets from Spanish farms. *Vet Microbiol* 146:260–268.
- 727 21. Anbalagan S, Peterson J, Wassman B, Elston J, Schwartz K. 2014. Genome sequence of torovirus  
728 identified from a pig with porcine epidemic diarrhea virus from the United States. *Genome Announc* 2.
- 729 22. ZM H, YL Y, LD X, B W, P Q, YW H. 2019. Porcine Torovirus (PToV)-A Brief Review of Etiology,  
730 Diagnostic Assays and Current Epidemiology. *Front Vet Sci* 6.
- 731 23. SL S, EJ S, RJ de G. 2006. Characterization of a Torovirus Main Proteinase. *J Virol* 80.
- 732 24. Snijder EJ, Horzinek MC. 1993. Toroviruses: replication, evolution and comparison with other members  
733 of the coronavirus-like superfamily. *J Gen Virol* 74:2305–2316.
- 734 25. Draker R, Roper RL, Petric M, Tellier R. 2006. The complete sequence of the bovine torovirus genome.  
735 *Virus Res* 115:56–68.
- 736 26. Snijder EJ, Den Boon JA, Spaan WJM, Verjans GMGM, Horzinek MC. 1989. Identification and Primary  
737 Structure of the Gene Encoding the Berne Virus Nucleocapsid Protein. *J Gen Virol* 70:3363–3370.
- 738 27. Horzinek MC, Ederveen J, Weiss M. 1985. The Nucleocapsid of Berne Virus. *J Gen Virol* 66:1287–1296.
- 739 28. Den Boon JA, Snijder EJ, Locker JK, Horzinek MC, Rottier PJ. 1991. Another triple-spanning envelope  
740 protein among intracellularly budding RNA viruses: the torovirus E protein. *Virology* 182:655–63.

- 741 29. Snijder EJ, Den Boon JA, Spaan WJ, Weiss M, Horzinek MC. 1990. Primary structure and post-  
742 translational processing of the Berne virus peplomer protein. *Virology* 178:355–63.
- 743 30. Cornelissen LA, Wierda CM, van der Meer FJ, Herrewegh AA, Horzinek MC, Egberink HF, de Groot RJ.  
744 1997. Hemagglutinin-esterase, a novel structural protein of torovirus. *J Virol* 71:5277–86.
- 745 31. Smits SL, Lavazza A, Matiz K, Horzinek MC, Koopmans MP, de Groot RJ. 2003. Phylogenetic and  
746 evolutionary relationships among torovirus field variants: evidence for multiple intertypic recombination  
747 events. *J Virol* 77:9567–77.
- 748 32. Cong Y, Zarlenga DS, Richt JA, Wang X, Wang Y, Suo S, Wang J, Ren Y, Ren X. 2013. Evolution and  
749 homologous recombination of the hemagglutinin-esterase gene sequences from porcine torovirus. *Virus*  
750 *Genes* 47:66–74.
- 751 33. Ito M, Tsuchiaka S, Naoi Y, Otomaru K, Sato M, Masuda T, Haga K, Oka T, Yamasato H, Omatsu T,  
752 Sugimura S, Aoki H, Furuya T, Katayama Y, Oba M, Shirai J, Katayama K, Mizutani T, Nagai M. 2016.  
753 Whole genome analysis of Japanese bovine toroviruses reveals natural recombination between porcine  
754 and bovine toroviruses. *Infect Genet Evol* 38:90–95.
- 755 34. Aita T, Kuwabara M, Murayama K, Sasagawa Y, Yabe S, Higuchi R, Tamura T, Miyazaki A, Tsunemitsu  
756 H. 2012. Characterization of epidemic diarrhea outbreaks associated with bovine torovirus in adult cows.  
757 *Arch Virol* 157:423–431.
- 758 35. Ito T, Okada N, Fukuyama S. 2007. Epidemiological analysis of bovine torovirus in Japan. *Virus Res*  
759 126:32–37.
- 760 36. Kuwabara M, Wada K, Maeda Y, Miyazaki A, Tsunemitsu H. 2007. First Isolation of Cytopathogenic  
761 Bovine Torovirus in Cell Culture from a Calf with Diarrhea. *Clin Vaccine Immunol* 14:998–1004.
- 762 37. Shimabukuro K, Ujike M, Ito T, Tsunemitsu H, Oshitani H, Taguchi F. 2013. Hemagglutination mediated  
763 by the spike protein of cell-adapted bovine torovirus. *Arch Virol* 158:1561.
- 764 38. Weiss M, Horzinek MC. 1986. Morphogenesis of Berne Virus (Proposed Family Toroviridae). *J Gen Virol*  
765 67:1305–1314.
- 766 39. Horzinek MC, Weiss M, Ederveen J. 1984. Berne Virus is Not “Coronavirus-like.” *J Gen Virol* 65:645–649.
- 767 40. Fagerland JA, Pohlenz JFL, Woode GN. 1986. A Morphological Study of the Replication of Breda Virus  
768 (Proposed Family Toroviridae) in Bovine Intestinal Cells. *J Gen Virol* 67:1293–1304.

- 769 41. Corman VM, Muth D, Niemeyer D, Drosten C. 2018. Hosts and Sources of Endemic Human  
770 Coronaviruses. *Adv Virus Res* 100:163–188.
- 771 42. Drosten C, Gunther S, Preiser W, van der Werf S, Brodt HR, Becker S, Rabenau H, Panning M,  
772 Kolesnikova L, Fouchier RA, Berger A, Burguiere AM, Cinatl J, Eickmann M, Escriou N, Grywna K,  
773 Kramme S, Manuguerra JC, Muller S, Rickerts V, Sturmer M, Vieth S, Klenk HD, Osterhaus AD,  
774 Schmitz H, Doerr HW. 2003. Identification of a novel coronavirus in patients with severe acute  
775 respiratory syndrome. *N Engl J Med* 2003/04/12. 348:1967–1976.
- 776 43. Kuiken T, Fouchier RA, Schutten M, Rimmelzwaan GF, van Amerongen G, van Riel D, Laman JD, de  
777 Jong T, van Doornum G, Lim W, Ling AE, Chan PK, Tam JS, Zambon MC, Gopal R, Drosten C, van der  
778 Werf S, Escriou N, Manuguerra JC, Stohr K, Peiris JS, Osterhaus AD. 2003. Newly discovered  
779 coronavirus as the primary cause of severe acute respiratory syndrome. *Lancet* 2003/08/02. 362:263–270.
- 780 44. Zaki AM, van Boheemen S, Bestebroer TM, Osterhaus AD, Fouchier RA. 2012. Isolation of a novel  
781 coronavirus from a man with pneumonia in Saudi Arabia. *N Engl J Med* 2012/10/19. 367:1814–1820.
- 782 45. Zhou P, Yang X-L, Wang X-G, Hu B, Zhang L, Zhang W, Si H-R, Zhu Y, Li B, Huang C-L, Chen H-D,  
783 Chen J, Luo Y, Guo H, Jiang R-D, Liu M-Q, Chen Y, Shen X-R, Wang X, Zheng X-S, Zhao K, Chen Q-J,  
784 Deng F, Liu L-L, Yan B, Zhan F-X, Wang Y-Y, Xiao G-F, Shi Z-L. 2020. A pneumonia outbreak associated  
785 with a new coronavirus of probable bat origin. *Nature* 579:270–273.
- 786 46. R L, X Z, J L, P N, B Y, H W, W W, H S, B H, N Z, Y B, X M, F Z, L W, T H, H Z, Z H, W Z, L Z, J C, Y M,  
787 J W, Y L, J Y, Z X, J M, WJ L, D W, W X, EC H, GF G, G W, W C, W S, W T. 2020. Genomic  
788 Characterisation and Epidemiology of 2019 Novel Coronavirus: Implications for Virus Origins and  
789 Receptor Binding. *Lancet (London, England)* 395.
- 790 47. Yount B, Curtis KM, Baric RS. 2000. Strategy for systematic assembly of large RNA and DNA genomes:  
791 transmissible gastroenteritis virus model. *J Virol* 74:10600–11.
- 792 48. F A, JM G, Z P, A I, E C, J P-D, L E. 2000. Engineering the Largest RNA Virus Genome as an Infectious  
793 Bacterial Artificial Chromosome. *Proc Natl Acad Sci U S A* 97:5516–21.
- 794 49. G T, R H-L, I S, V T, HJ T. 2008. Genome Organization and Reverse Genetic Analysis of a Type I Feline  
795 Coronavirus. *J Virol* 82.
- 796 50. Donaldson EF, Yount B, Sims AC, Burkett S, Pickles RJ, Baric RS. 2008. Systematic assembly of a full-



- length infectious clone of human coronavirus NL63. *J Virol* 82:11948–57.
51. Á B, A F, Z Z, Á H, L D, F A, L E, S B. 2012. Molecular Characterization of Feline Infectious Peritonitis Virus Strain DF-2 and Studies of the Role of ORF3abc in Viral Cell Tropism. *J Virol* 86.
52. Tekes G, Spies D, Bank-Wolf B, Thiel V, Thiel H-J. 2012. A reverse genetics approach to study feline infectious peritonitis. *J Virol* 86:6994–8.
53. F A, M L D, I S, S Z, J L N-T, S M-J, G A, L E. 2013. Engineering a Replication-Competent, Propagation-Defective Middle East Respiratory Syndrome Coronavirus as a Vaccine Candidate. *MBio* 4:e00650-13.
54. Scobey T, Yount BL, Sims AC, Donaldson EF, Agnihothram SS, Menachery VD, Graham RL, Swanstrom J, Bove PF, Kim JD, Grego S, Randell SH, Baric RS. 2013. Reverse genetics with a full-length infectious cDNA of the Middle East respiratory syndrome coronavirus. *Proc Natl Acad Sci U S A* 110:16157–62.
55. Beall A, Yount B, Lin C-M, Hou Y, Wang Q, Saif L, Baric R. 2016. Characterization of a Pathogenic Full-Length cDNA Clone and Transmission Model for Porcine Epidemic Diarrhea Virus Strain PC22A. *MBio* 7:e01451-15.
56. Ehmann R, Kristen-Burmann C, Bank-Wolf B, König M, Herden C, Hain T, Thiel H-J, Ziebuhr J, Tekes G. 2018. Reverse Genetics for Type I Feline Coronavirus Field Isolate To Study the Molecular Pathogenesis of Feline Infectious Peritonitis. *MBio* 9.
57. D M, B M, D N, S S, N O, M A M, C D. 2017. Transgene Expression in the Genome of Middle East Respiratory Syndrome Coronavirus Based on a Novel Reverse Genetics System Utilizing Red-mediated Recombination Cloning. *J Gen Virol* 98.
58. Terada Y, Kuroda Y, Morikawa S, Matsuura Y, Maeda K, Kamitani W. 2019. Establishment of a Virulent Full-Length cDNA Clone for Type I Feline Coronavirus Strain C3663. *J Virol* 93.
59. Thiel V, Herold J, Schelle B, Siddell SG. 2001. Infectious RNA transcribed in vitro from a cDNA copy of the human coronavirus genome cloned in vaccinia virus. *J Gen Virol* 82:1273–1281.
60. T TNT, F L, N E, P V, H S, J P, J K, S S, M H, A K, M G, K S, L L, L H, M W, S P, D H, V C, S C-P, S S, D M, D N, V M C, M A M, C D, R D, J J, V T. 2020. Rapid Reconstruction of SARS-CoV-2 Using a Synthetic Genomics Platform. *Nature* 582:561–565.
61. Hou YJ, Okuda K, Edwards CE, Martinez DR, Asakura T, Dinnon KH, Kato T, Lee RE, Yount BL, Mascenik TM, Chen G, Olivier KN, Ghio A, Tse L V., Leist SR, Gralinski LE, Schäfer A, Dang H, Gilmore

- 825 R, Nakano S, Sun L, Fulcher ML, Livraghi-Butrico A, Nicely NI, Cameron M, Cameron C, Kelvin DJ, de  
826 Silva A, Margolis DM, Markmann A, Bartelt L, Zumwalt R, Martinez FJ, Salvatore SP, Borczuk A, Tata  
827 PR, Sontake V, Kimple A, Jaspers I, O'Neal WK, Randell SH, Boucher RC, Baric RS. 2020. SARS-CoV-2  
828 Reverse Genetics Reveals a Variable Infection Gradient in the Respiratory Tract. *Cell*.
- 829 62. Casais R, Thiel V, Siddell SG, Cavanagh D, Britton P. 2001. Reverse Genetics System for the Avian  
830 Coronavirus Infectious Bronchitis Virus. *J Virol* 75:12359–12369.
- 831 63. B Y, MR D, SR W, RS B. 2002. Systematic Assembly of a Full-Length Infectious cDNA of Mouse Hepatitis  
832 Virus Strain A59. *J Virol* 76:11065–78.
- 833 64. B Y, KM C, EA F, LE H, PB J, E P, MR D, TW G, RS B. 2003. Reverse Genetics With a Full-Length  
834 Infectious cDNA of Severe Acute Respiratory Syndrome Coronavirus. *Proc Natl Acad Sci U S A*  
835 100:12995–3000.
- 836 65. Coley SE, Lavi E, Sawicki SG, Fu L, Schelle B, Karl N, Siddell SG, Thiel V. 2005. Recombinant mouse  
837 hepatitis virus strain A59 from cloned, full-length cDNA replicates to high titers in vitro and is fully  
838 pathogenic in vivo. *J Virol* 79:3097–106.
- 839 66. F A, ML D, C G, D E, E A, J O, I S, S Z, S A, JL M, A N, C C, L E. 2006. Construction of a Severe Acute  
840 Respiratory Syndrome Coronavirus Infectious cDNA Clone and a Replicon to Study Coronavirus RNA  
841 Synthesis. *J Virol* 80:10900–6.
- 842 67. St-Jean JR, Desforges M, Almazán F, Jacomy H, Enjuanes L, Talbot PJ. 2006. Recovery of a  
843 neurovirulent human coronavirus OC43 from an infectious cDNA clone. *J Virol* 80:3670–4.
- 844 68. MM B, RL G, EF D, B R, AC S, T S, RJ P, D C, RE J, RS B, MR D. 2008. Synthetic Recombinant Bat  
845 SARS-like Coronavirus Is Infectious in Cultured Cells and in Mice. *Proc Natl Acad Sci U S A* 105.
- 846 69. Ito T, Katayama S, Okada N, Masubuchi K, Fukuyama S i., Shimizu M. 2010. Genetic and Antigenic  
847 Characterization of Newly Isolated Bovine Toroviruses from Japanese Cattle. *J Clin Microbiol* 48:1795–  
848 1800.
- 849 70. Kadowaki S, Chen Z, Asanuma H, Aizawa C, Kurata T, Tamura S. 2000. Protection against influenza  
850 virus infection in mice immunized by administration of hemagglutinin-expressing DNAs with  
851 electroporation. *Vaccine* 18:2779–88.
- 852 71. K T, G S, D P, A F, S K. 2013. MEGA6: Molecular Evolutionary Genetics Analysis Version 6.0. *Mol Biol*

- 853 Evol 30.
- 854 72. Horton MR, Pease LR. 1991. Recombination and mutagenesis of DNA-sequences using PCR. In Directed  
855 mutagenesis: a practical approach. Edited by M. J. McPherson. 217-247.
- 856 73. REED LJ, MUENCH H. 1938. A SIMPLE METHOD OF ESTIMATING FIFTY PER CENT  
857 ENDPOINTS<sup>12</sup>. *Am J Epidemiol* 27:493–497.
- 858 74. van Vliet ALW, Smits SL, Rottier PJM, Groot RJ de. 2002. Discontinuous and non-discontinuous  
859 subgenomic RNA transcription in a nidovirus. *EMBO J* 21:6571–6580.
- 860 75. Suzuki T, Terada Y, Enjuanes L, Ohashi S, Kamitani W. 2018. S1 Subunit of Spike Protein from a  
861 Current Highly Virulent Porcine Epidemic Diarrhea Virus Is an Important Determinant of Virulence in  
862 Piglets. *Viruses* 10.
- 863 76. Terada Y, Kawachi K, Matsuura Y, Kamitani W. 2017. MERS coronavirus nsp1 participates in an  
864 efficient propagation through a specific interaction with viral RNA. *Virology* 511:95–105.
- 865 77. Sakai Y, Kawachi K, Terada Y, Omori H, Matsuura Y, Kamitani W. 2017. Two-amino acids change in the  
866 nsp4 of SARS coronavirus abolishes viral replication. *Virology* 510:165–174.
- 867 78. Muth D, Meyer B, Niemeyer D, Schroeder S, Osterrieder N, Müller MA, Drosten C. 2017. Transgene  
868 expression in the genome of Middle East respiratory syndrome coronavirus based on a novel reverse  
869 genetics system utilizing Red-mediated recombination cloning. *J Gen Virol* 98:2461–2469.
- 870 79. De Groot RJ. 2006. Structure, function and evolution of the hemagglutinin-esterase proteins of corona-  
871 and toroviruses. *Glycoconj J* 23:59–72.
- 872 80. B S, HJ G, R B, HD K, G H. 1990. Hemagglutinating encephalomyelitis virus attaches to N-acetyl-9-O-  
873 acetylneuraminic acid-containing receptors on erythrocytes: comparison with bovine coronavirus and  
874 influenza C virus. *Virus Res* 16.
- 875 81. Vlasak R, Luytjes W, Spaan W, Palese P. 1988. Human and bovine coronaviruses recognize sialic acid-  
876 containing receptors similar to those of influenza C viruses. *Proc Natl Acad Sci* 85:4526–4529.
- 877 82. Desforges M, Desjardins J, Zhang C, Talbot PJ. 2013. The Acetyl-Esterase Activity of the Hemagglutinin-  
878 Esterase Protein of Human Coronavirus OC43 Strongly Enhances the Production of Infectious Virus. *J*  
879 *Virol* 87:3097–3107.
- 880 83. Bakkens MJG, Lang Y, Feitsma LJ, Hulswit RJG, de Poot SAH, van Vliet ALW, Margine I, de Groot-

- 881 Mijnes JDF, van Kuppeveld FJM, Langereis MA, Huizinga EG, de Groot RJ. 2017. Betacoronavirus  
882 Adaptation to Humans Involved Progressive Loss of Hemagglutinin-Esterase Lectin Activity. *Cell Host*  
883 *Microbe* 21:356–366.
- 884 84. Williams RK, Jiang GS, Holmes K V. 1991. Receptor for mouse hepatitis virus is a member of the  
885 carcinoembryonic antigen family of glycoproteins. *Proc Natl Acad Sci* 88:5533–5536.
- 886 85. Langereis MA, Vliet ALW van, Boot W, Groot RJ de. 2010. Attachment of Mouse Hepatitis Virus to O-  
887 Acetylated Sialic Acid Is Mediated by Hemagglutinin-Esterase and Not by the Spike Protein. *J Virol*  
888 84:8970–8974.
- 889 86. Luytjes W, Bredenbeek PJ, Noten AFH, Horzinek MC, Spaan WJM. 1988. Sequence of mouse hepatitis  
890 virus A59 mRNA 2: Indications for RNA recombination between coronaviruses and influenza C virus.  
891 *Virology* 166:415–422.
- 892 87. Yokomori K, Banner LR, Lai MMC. 1991. Heterogeneity of gene expression of the hemagglutinin-esterase  
893 (HE) protein of murine coronaviruses. *Virology* 183:647.
- 894 88. Lissenberg A, Vrolijk MM, Vliet ALW van, Langereis MA, Groot-Mijnes JDF de, Rottier PJM, Groot RJ  
895 de. 2005. Luxury at a Cost? Recombinant Mouse Hepatitis Viruses Expressing the Accessory  
896 Hemagglutinin Esterase Protein Display Reduced Fitness In Vitro. *J Virol* 79:15054–15063.
- 897 89. Lehmann KC, Snijder EJ, Posthuma CC, Gorbalenya AE. 2015. What we know but do not understand  
898 about nidovirus helicases. *Virus Res* 202:12–32.
- 899 90. Hao W, Wojdyla JA, Zhao R, Han R, Das R, Zlatev I, Manoharan M, Wang M, Cui S. 2017. Crystal  
900 structure of Middle East respiratory syndrome coronavirus helicase. *PLoS Pathog* 13:e1006474.
- 901 91. Tamura K, Stecher G, Peterson D, Filipski A, Kumar S. 2013. MEGA6: Molecular Evolutionary Genetics  
902 Analysis version 6.0. *Mol Biol Evol* 30:2725–9.
- 903 92. van Dinten LC, van Tol H, Gorbalenya AE, Snijder EJ. 2000. The predicted metal-binding region of the  
904 arterivirus helicase protein is involved in subgenomic mRNA synthesis, genome replication, and virion  
905 biogenesis. *J Virol* 74:5213–23.
- 906 93. Seybert A, Posthuma CC, van Dinten LC, Snijder EJ, Gorbalenya AE, Ziebuhr J. 2005. A complex zinc  
907 finger controls the enzymatic activities of nidovirus helicases. *J Virol* 79:696–704.
- 908 94. van Vliet ALW, Smits SL, Rottier PJM, de Groot RJ. 2002. Discontinuous and non-discontinuous

909

subgenomic RNA transcription in a nidovirus. *EMBO J* 21:6571–80.

910

95. Stewart H, Brown K, Dinan AM, Irigoyen N, Snijder EJ, Firth AE. 2018. Transcriptional and

911

Translational Landscape of Equine Torovirus. *J Virol* 92.

912

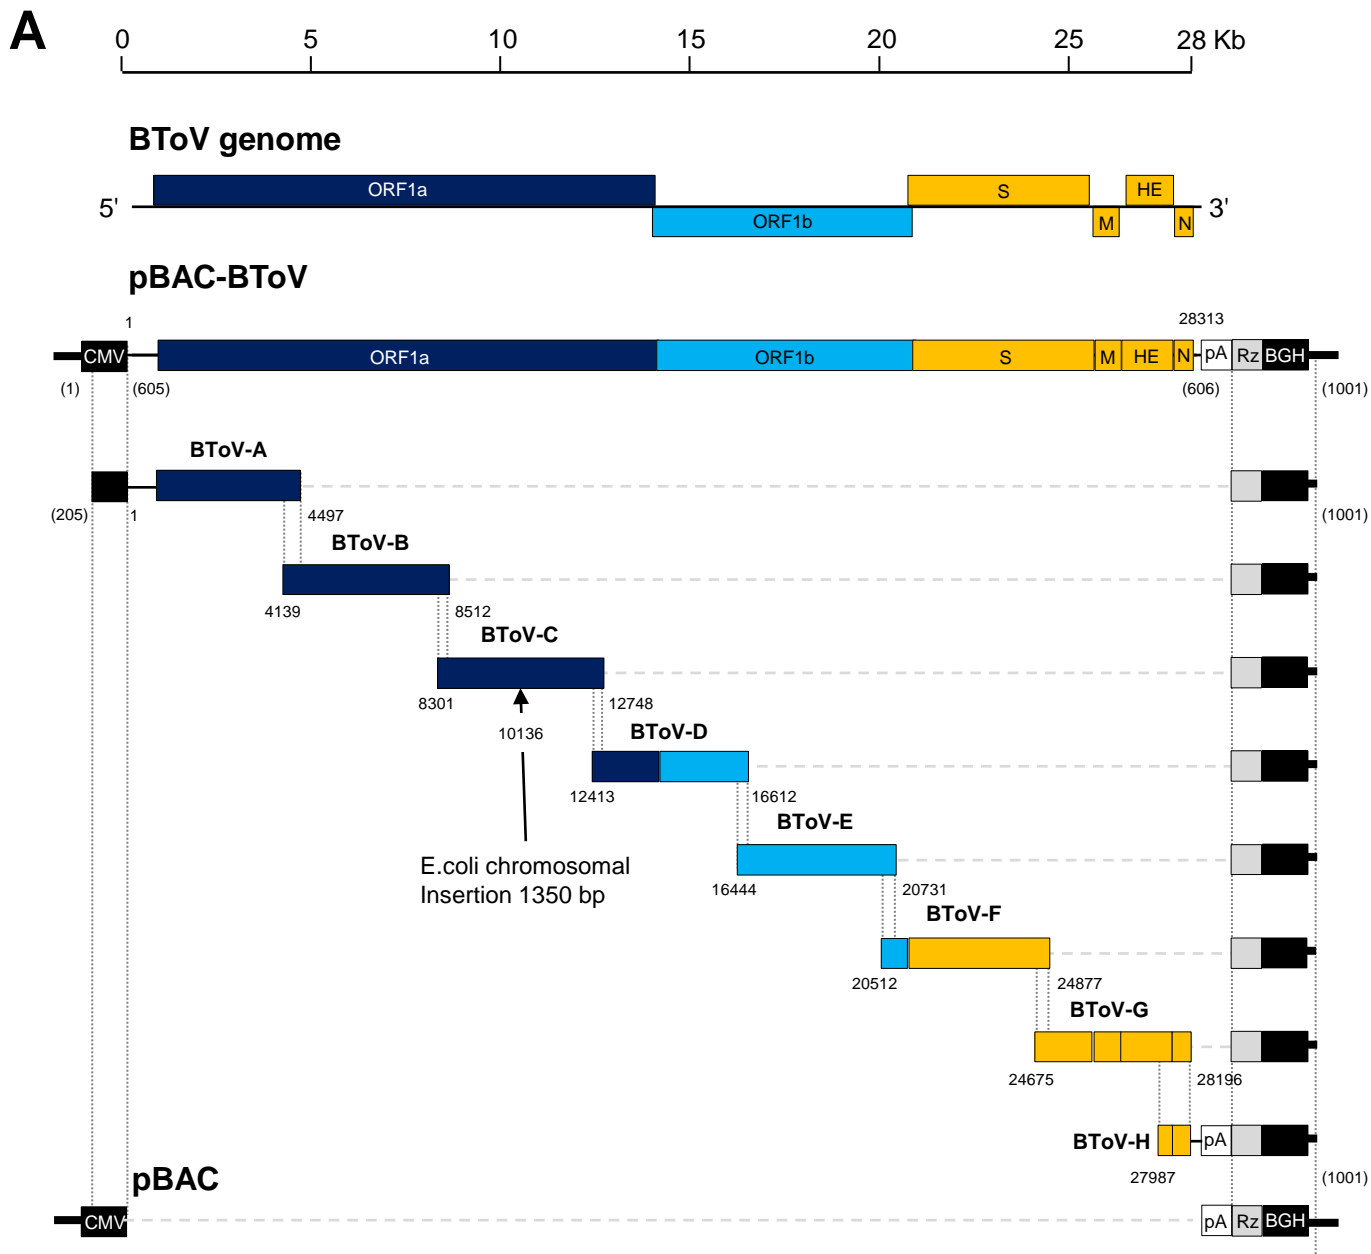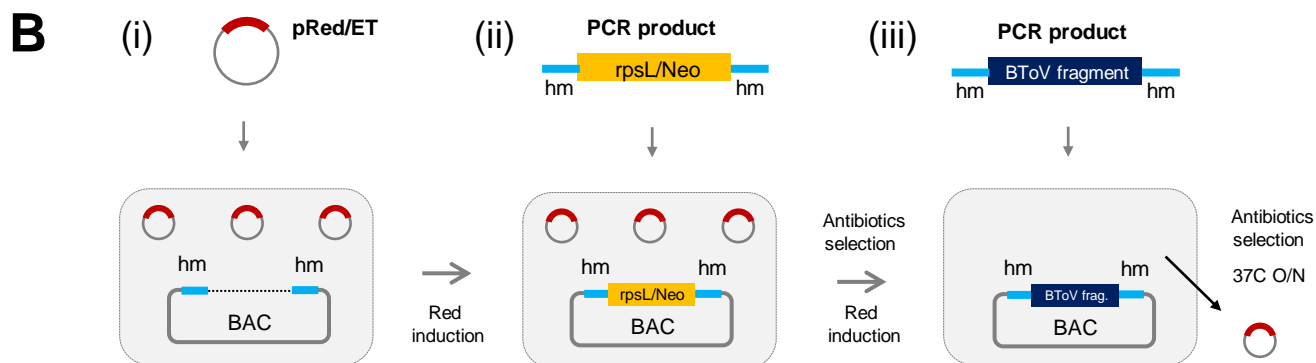

**Fig.1**

**A**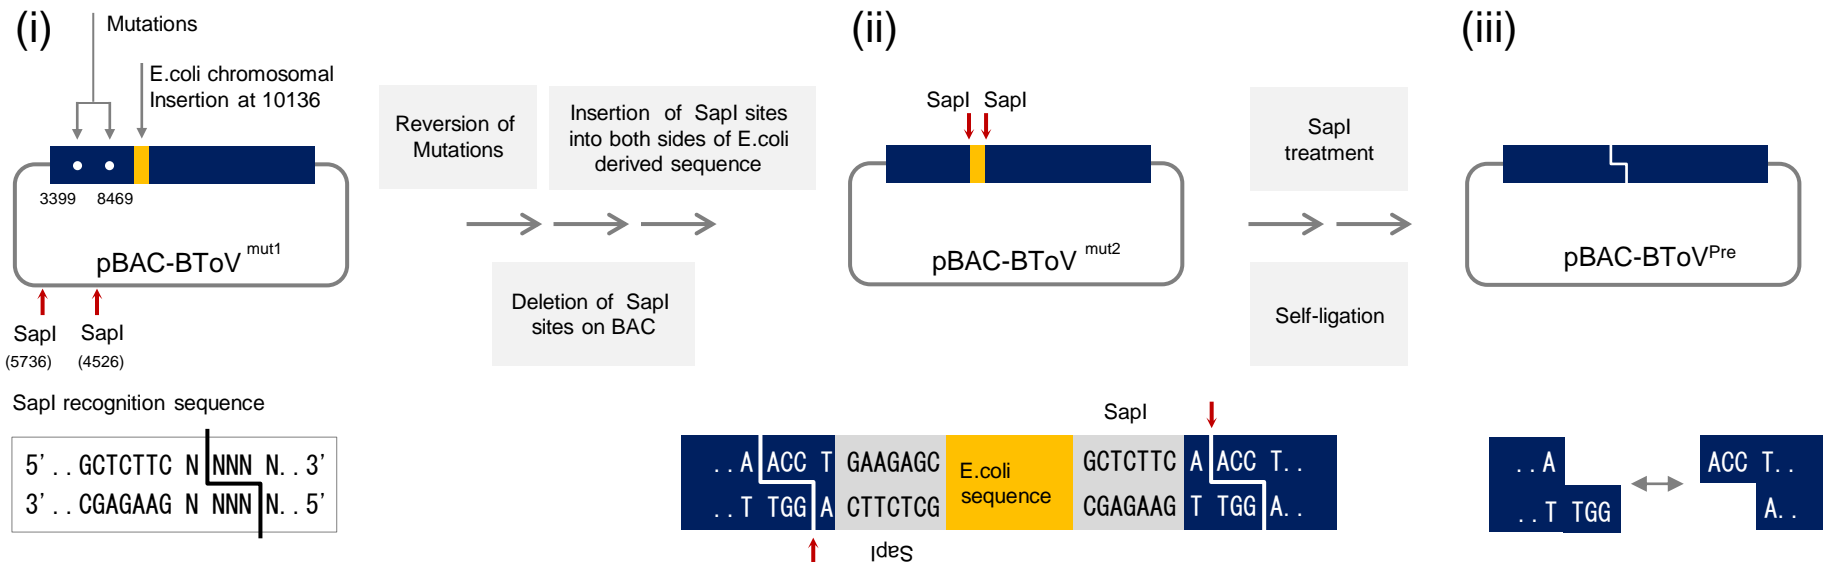**B**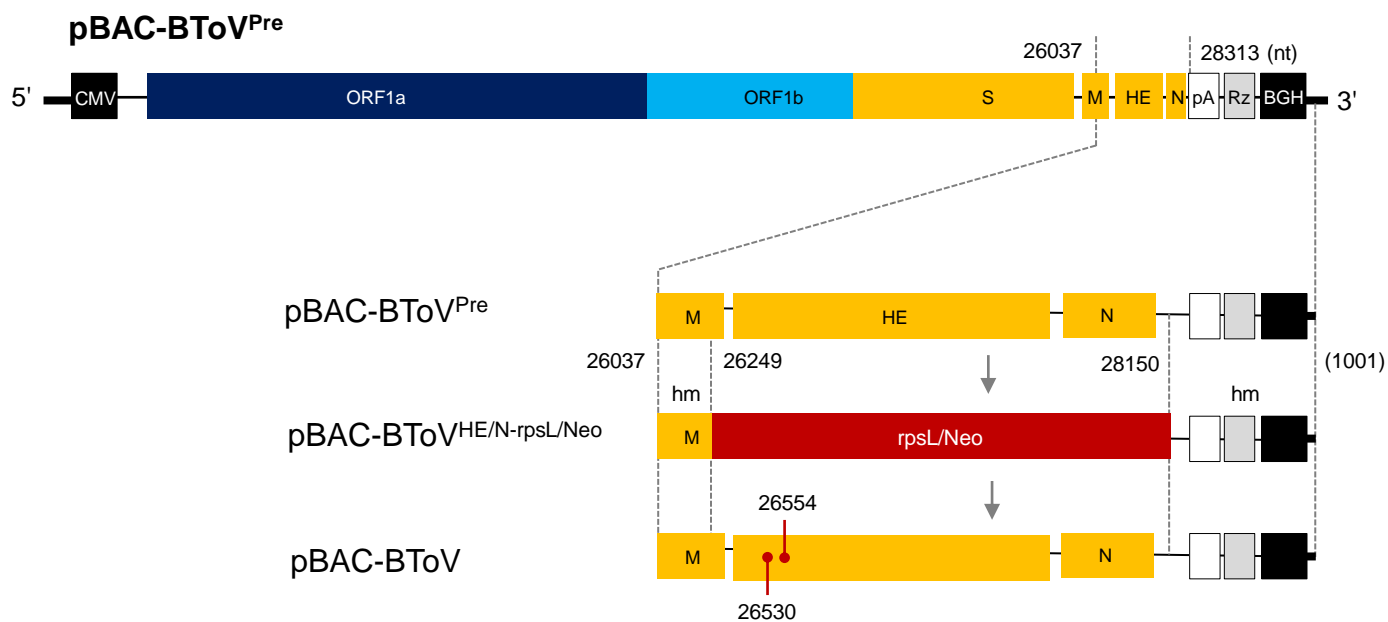**Fig.2**

**A**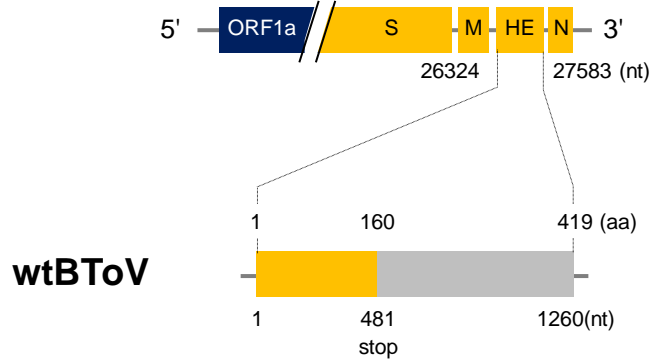**rBToV (rHEs)**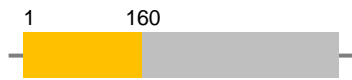**rHEf**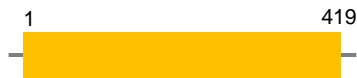**rHEs/HA**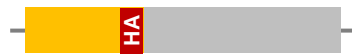**rHEf/HA**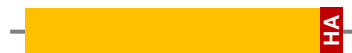**rEGFP**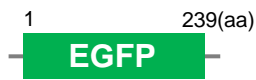**B**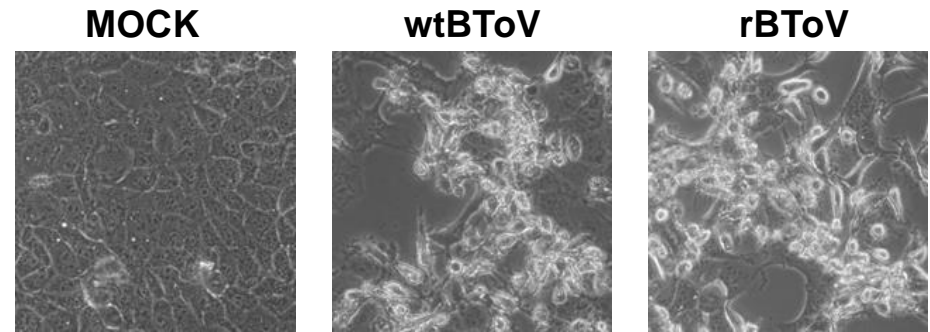**C**

26526 26554

**wtBToV:** TGTT TTTGTCATTAC ATTGGAATAC TCT

**rBToV:** TGTT CTTGTCATTAC ATTGGAATAC A TCT

**wtBToV**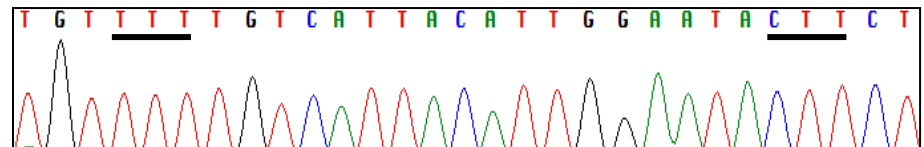**rBToV**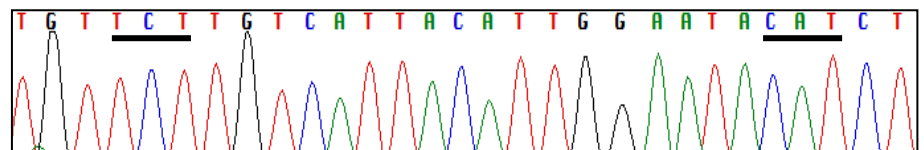



**A**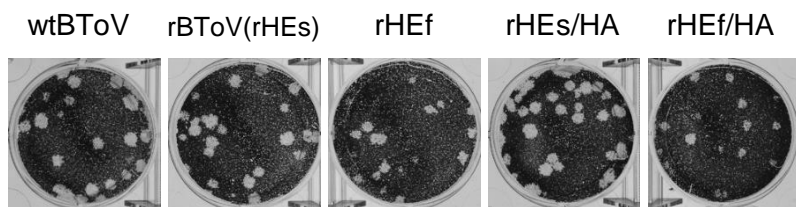**B**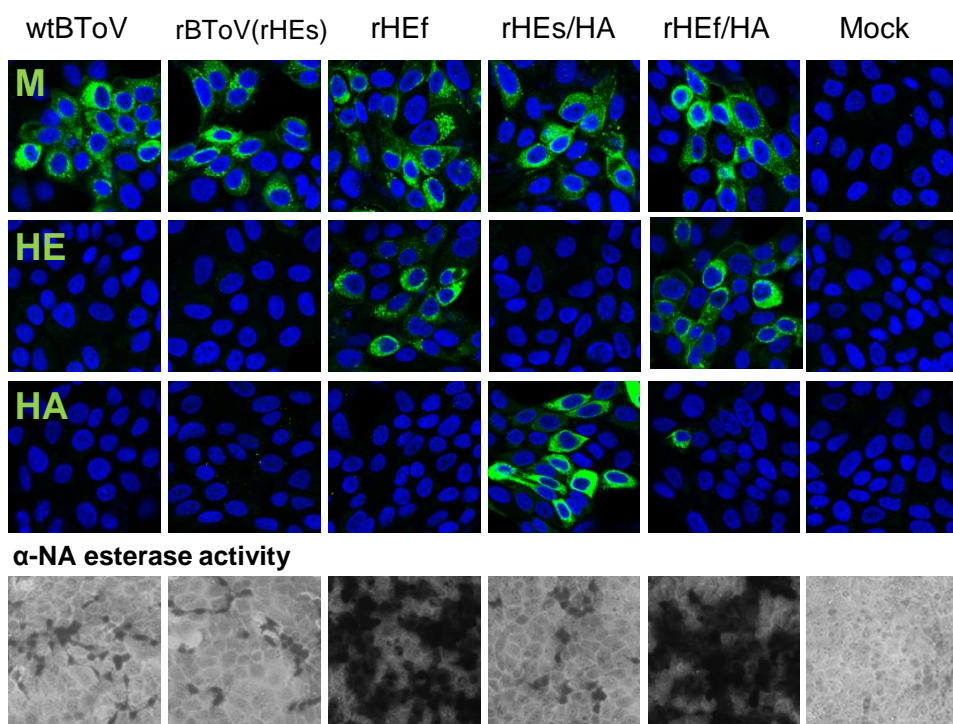**C**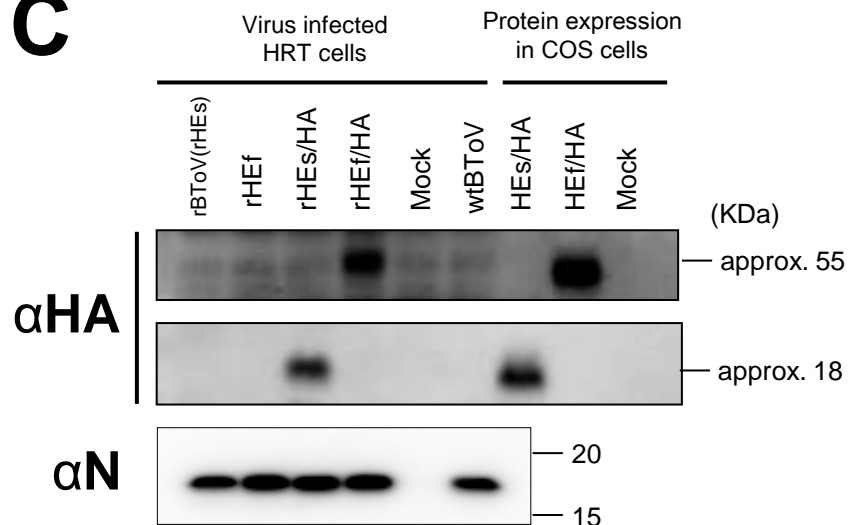**D**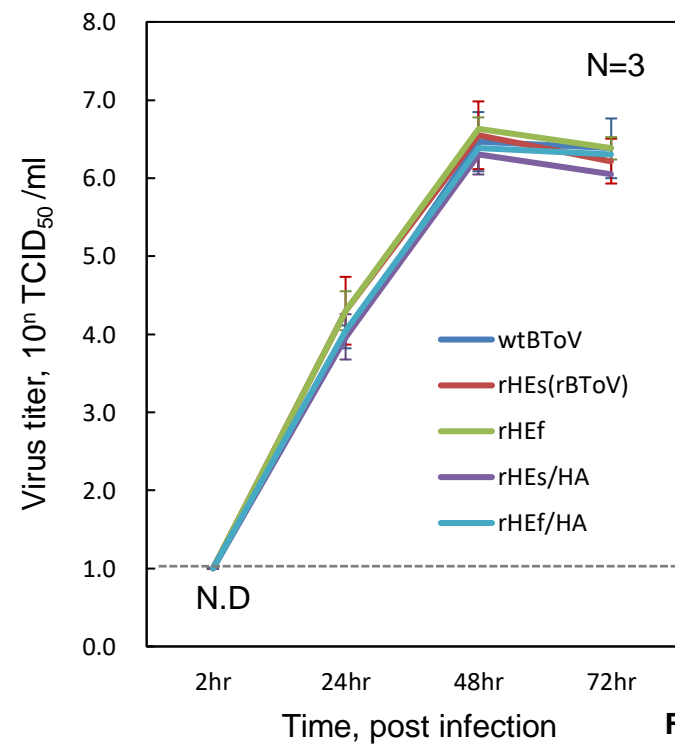**Fig.4**

**A**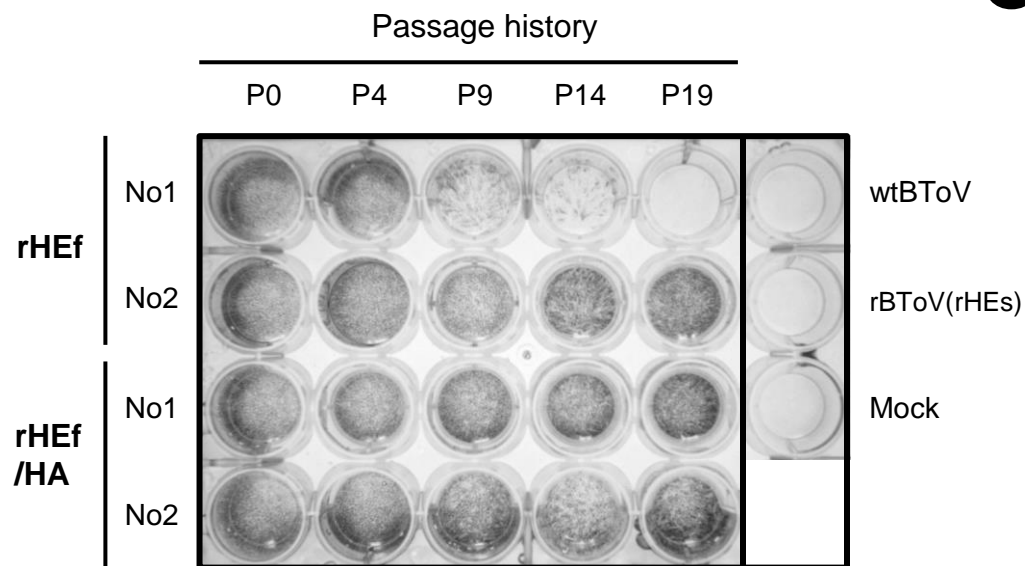**B**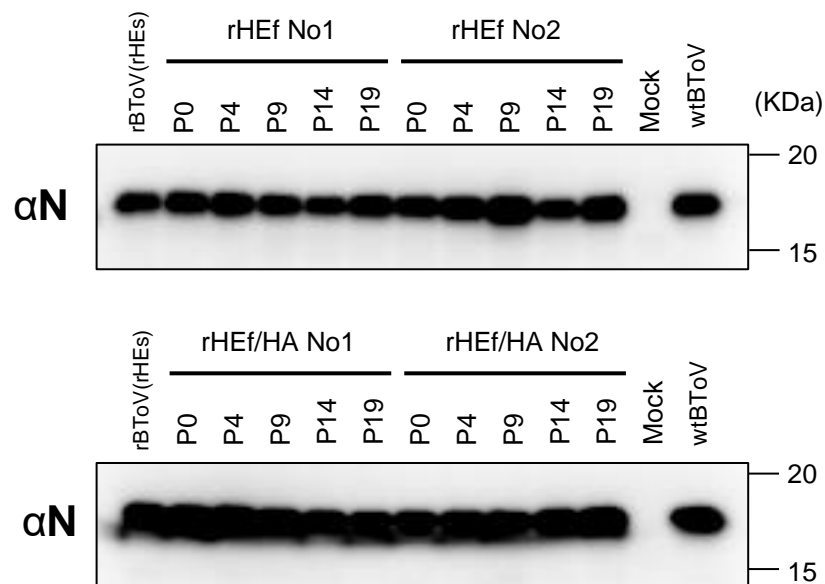**C**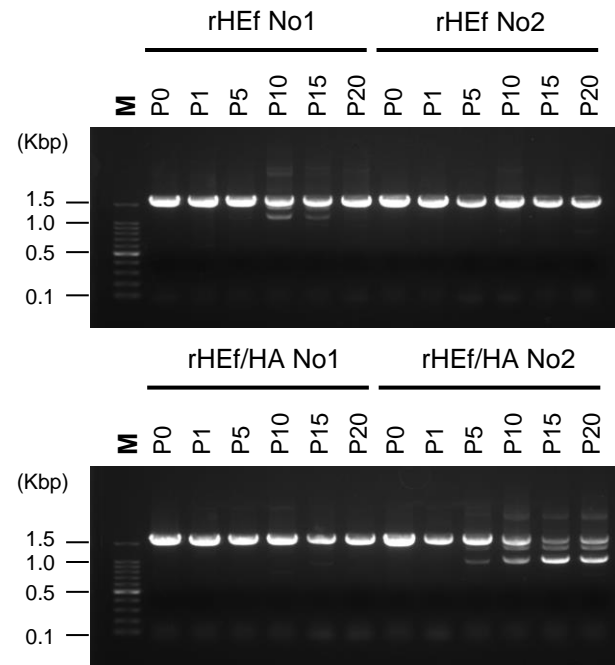**D**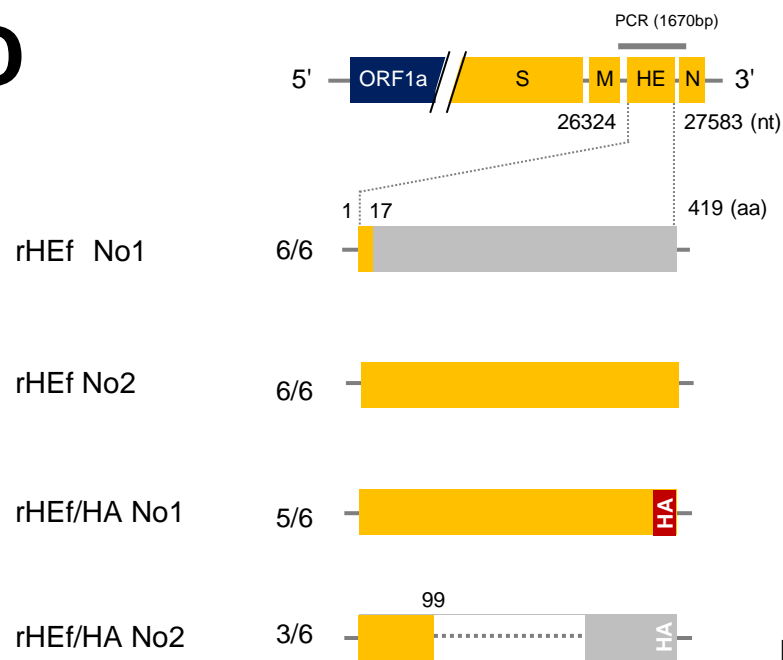**Fig.5**

**A**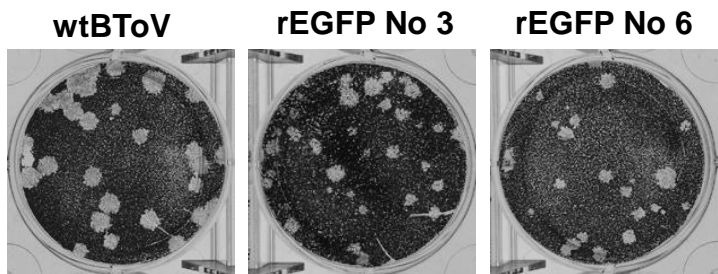**B**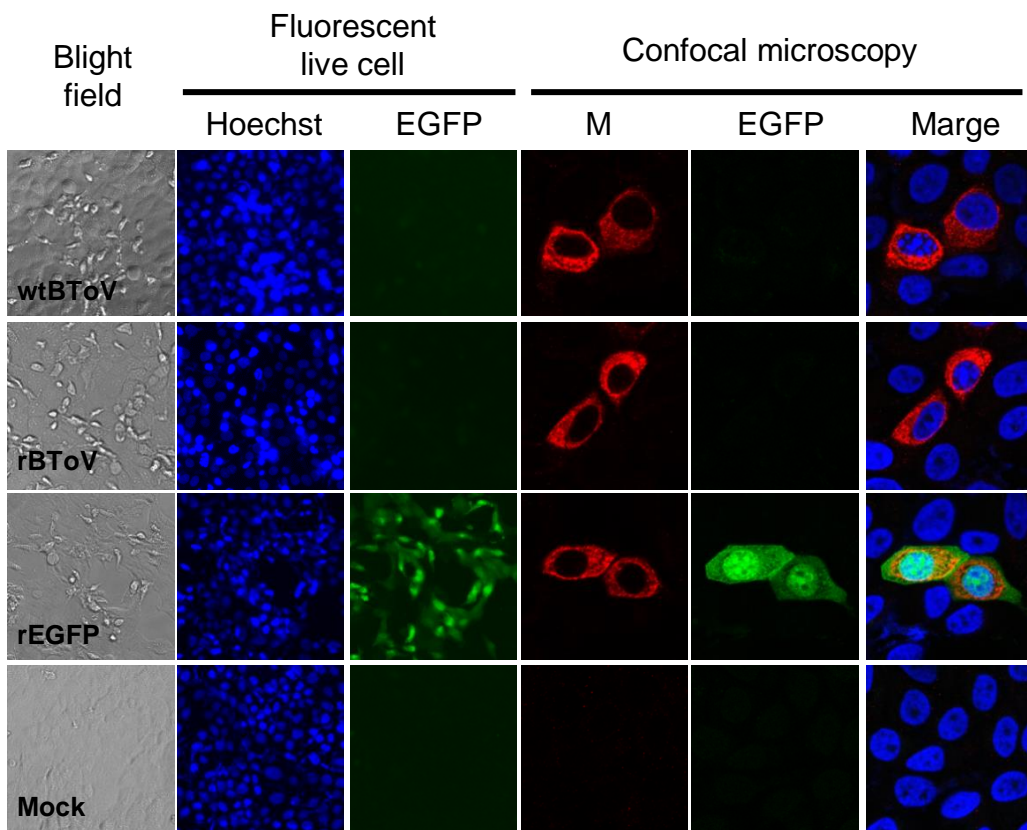**C**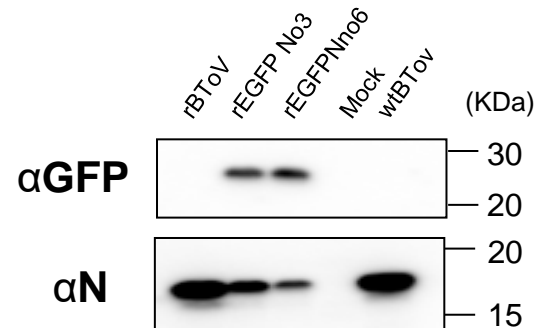**D**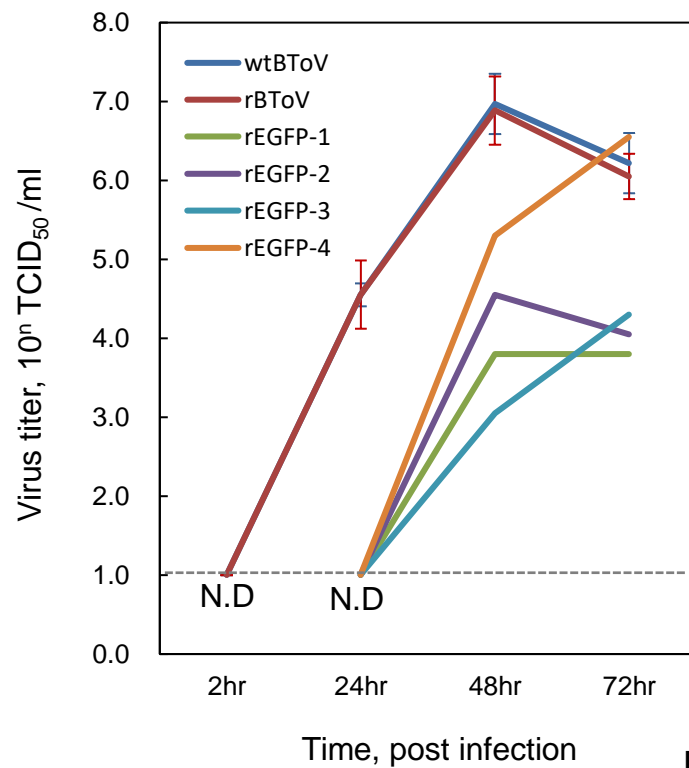**Fig.6**

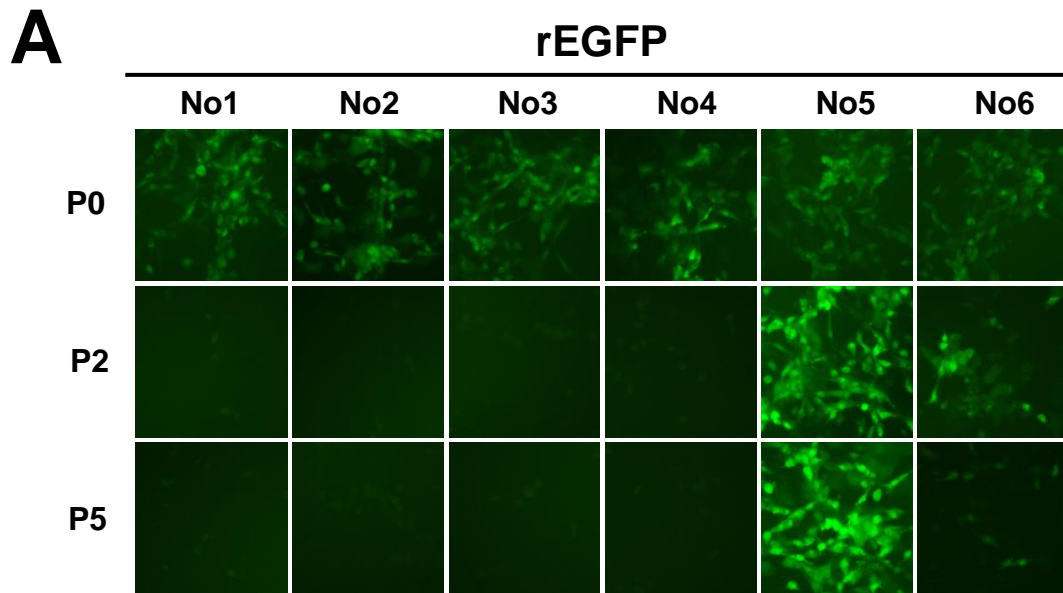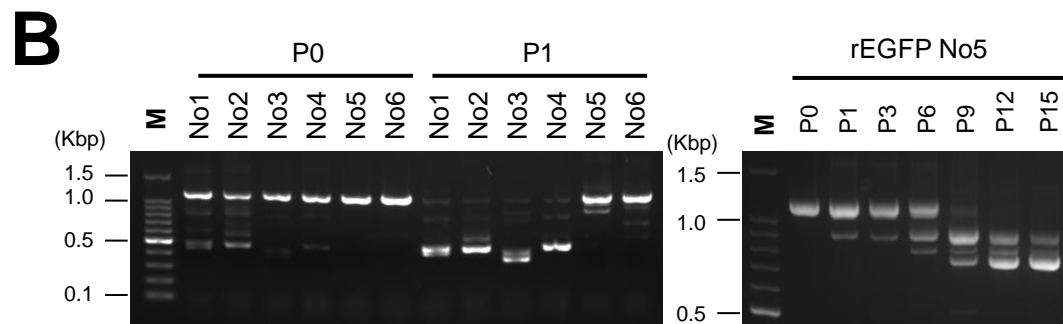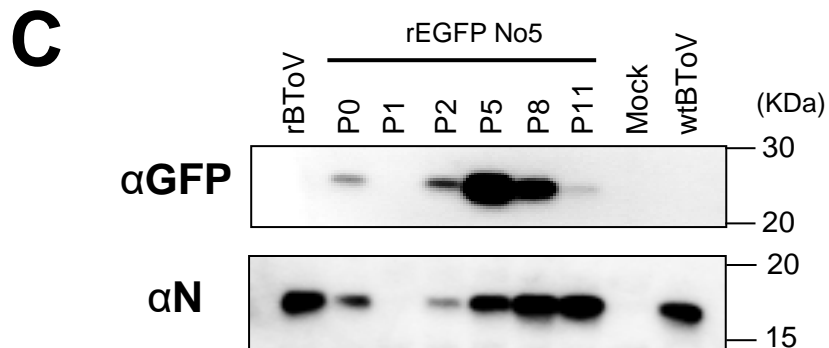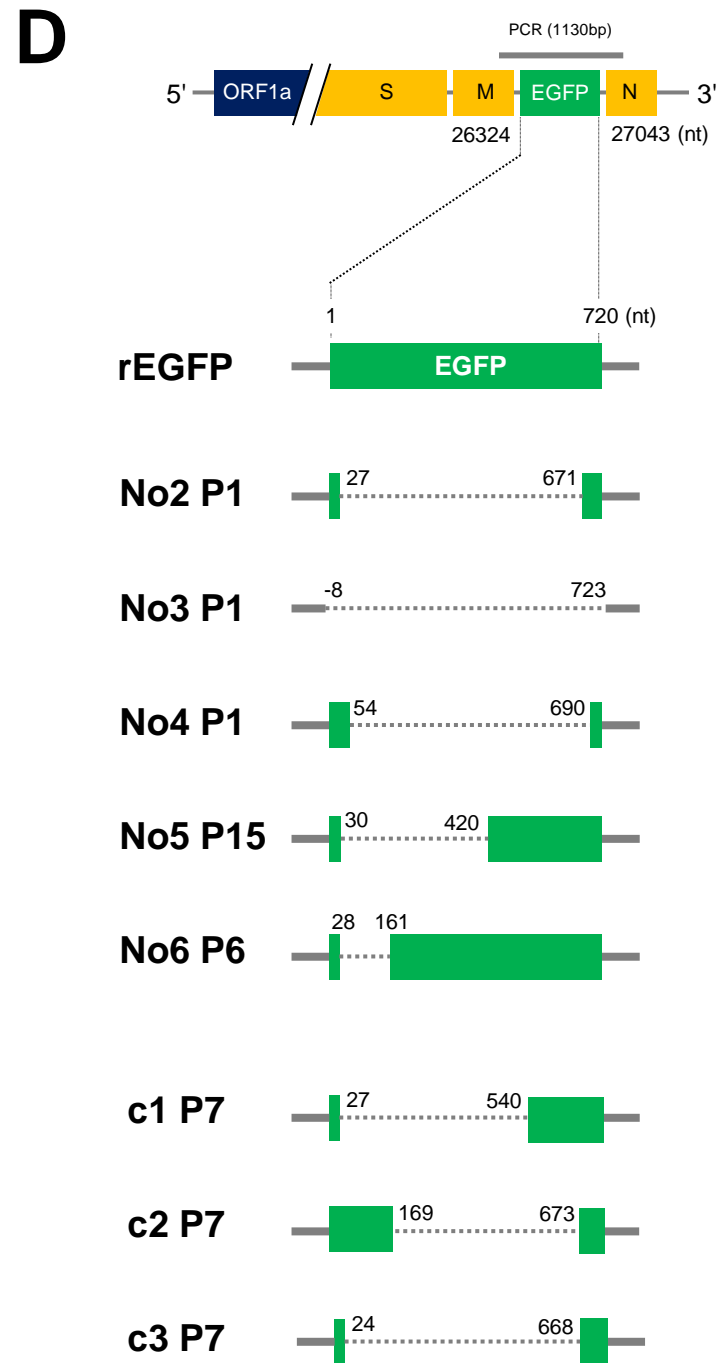

**Fig.7**

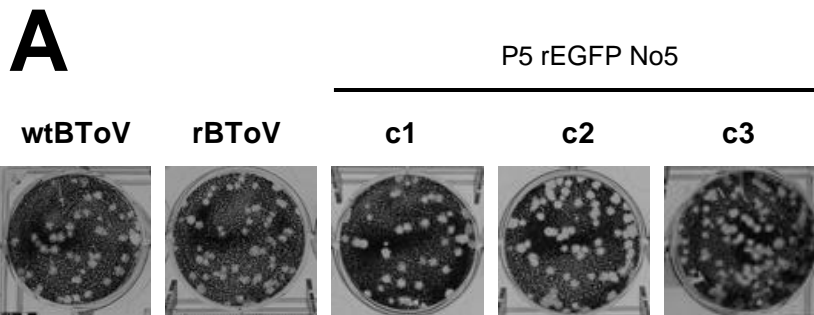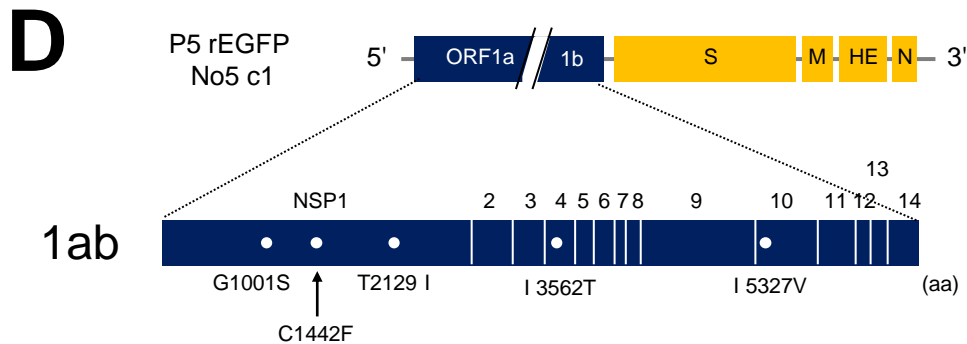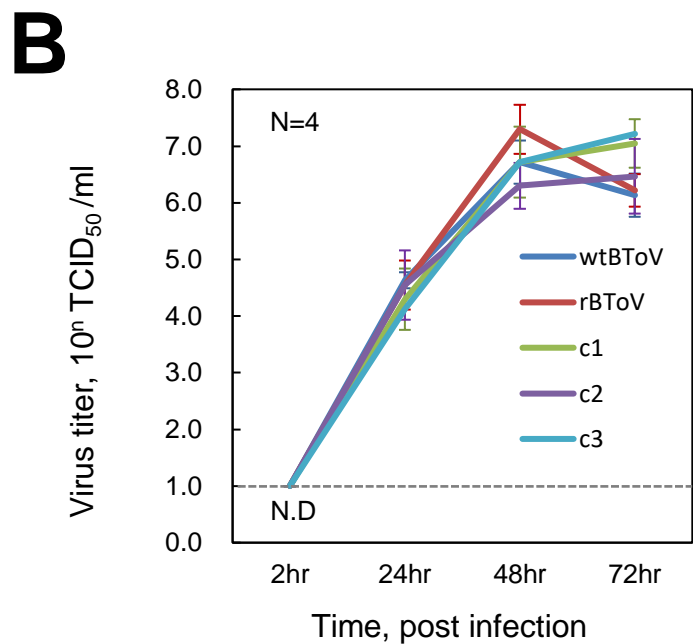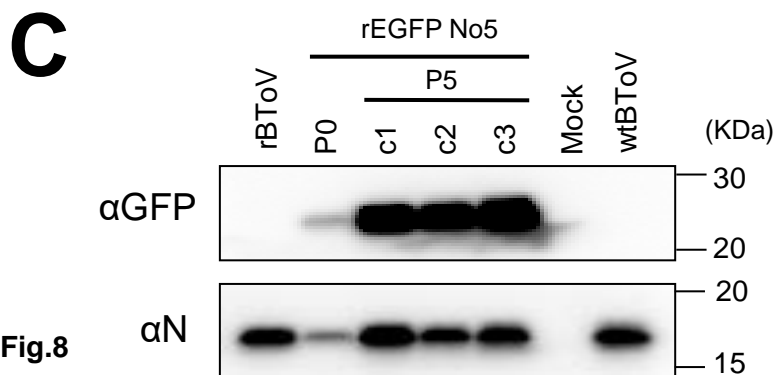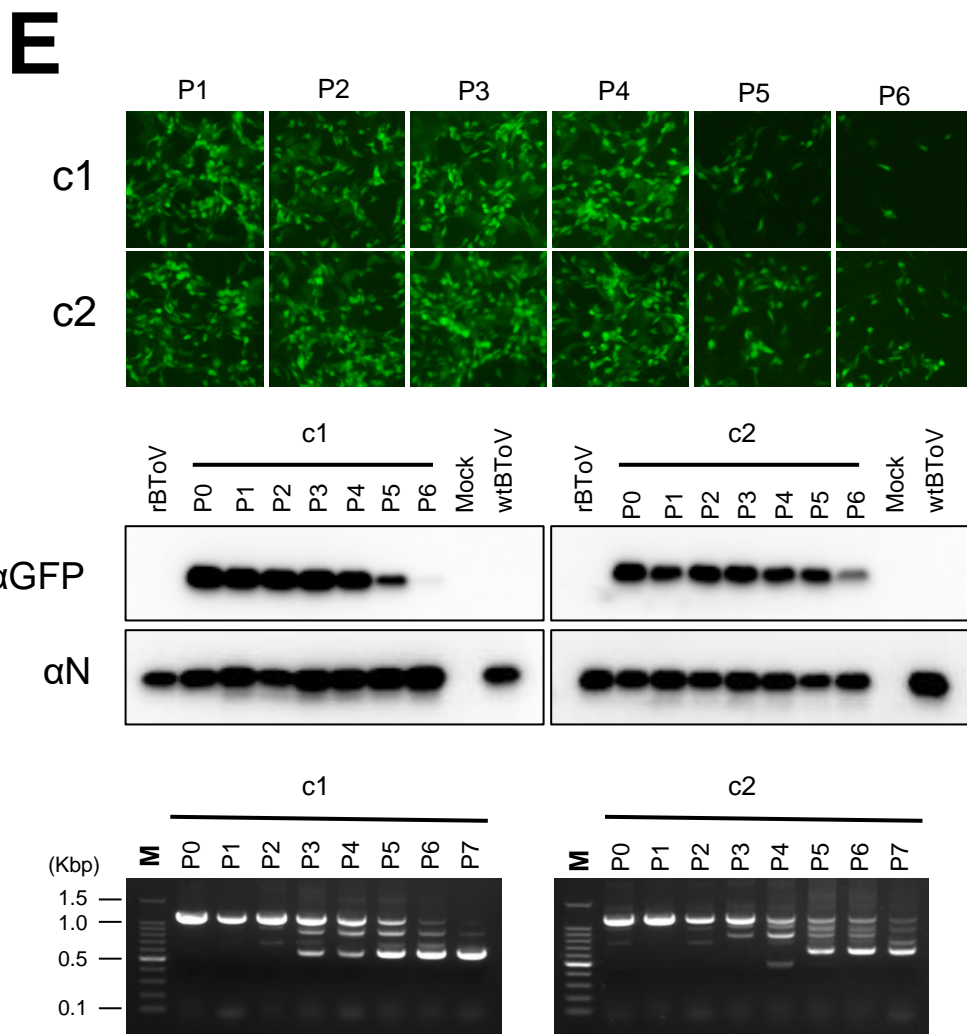

Source: http://biorxiv.org/content/10.1101/2020.10.28.358754v1.full.pdf
